# Supplementary material for: Opposite variations of peak and low ozone concentrations in eastern China: Positive effects of NO x control on ozone pollution
Source: Copernicus journal article supplement (doi:10.5194/egusphere-2024-341), 2024-04-30
Supplement: Supplementary file 1 [file egusphere-2024-341-supplement.pdf]

# Opposite variations of peak and low ozone concentrations in eastern China: Positive effects of NO<sub>x</sub> control on ozone pollution

Zhuang Wang<sup>1,2</sup>, Chune Shi<sup>1,2</sup>, Hao Zhang<sup>1,2</sup>, Xianguang Ji<sup>8</sup>, Yizhi Zhu<sup>7</sup>, Congzi Xia<sup>10</sup>, Xiaoyun Sun<sup>1,2</sup>, Xinfeng Lin<sup>2</sup>, Shaowei Yan<sup>2</sup>, Suyao Wang<sup>9</sup>, Yuan Zhou<sup>11,12</sup>, Chengzhi Xing<sup>3\*</sup>, Yujia Chen<sup>1,2\*</sup>, Cheng Liu<sup>4,3,5,6\*</sup>

<sup>1</sup>Anhui Province Key Laboratory of Atmospheric Science and Satellite Remote Sensing, Anhui Institute of Meteorological Sciences, Hefei 230031, China

<sup>2</sup>Shouxian National Climatology Observatory, Huaihe River Basin Typical Farm Eco-meteorological Experiment Field of CMA, Shouxian 232200, China

<sup>3</sup>Key Lab of Environmental Optics and Technology, Anhui Institute of Optics and Fine Mechanics, Hefei Institutes of Physical Science, Chinese Academy of Sciences, Hefei 230031, China

<sup>4</sup>Department of Precision Machinery and Precision Instrumentation, University of Science and Technology of China, Hefei, 230026, China.

<sup>5</sup>Center for Excellence in Regional Atmospheric Environment, Institute of Urban Environment, Chinese Academy of Sciences, Xiamen 361021, China

<sup>6</sup>Key Laboratory of Precision Scientific Instrumentation of Anhui Higher Education Institutes, University of Science and Technology of China, Hefei, 230026, China.

<sup>7</sup>School of Environmental Science and Engineering, Suzhou University of Science and Technology, Suzhou 215009, China

<sup>8</sup>Information Materials and Intelligent Sensing Laboratory of Anhui Province, Anhui University, Hefei 230601, China

<sup>9</sup>HuaiBei Meteorological Bureau, Huaibei 235000, Anhui, China

<sup>10</sup>Institute of Big Data for Vocational Education, Guangdong Polytechnic of Science and Technology, Zhuhai 519000, China

<sup>11</sup>Jiangxi Ecological Meteorology Center, Nanchang 330096, China

<sup>12</sup>Nanchang National Climate Observatory, Nanchang 330043, China

*Correspondence to:* Chengzhi Xing ([xingcz@aiofm.ac.cn](mailto:xingcz@aiofm.ac.cn)), Yujia Chen ([chenyj18@mail.ustc.edu.cn](mailto:chenyj18@mail.ustc.edu.cn)), Cheng Liu ([chliu81@ustc.edu.cn](mailto:chliu81@ustc.edu.cn))

## Figures:

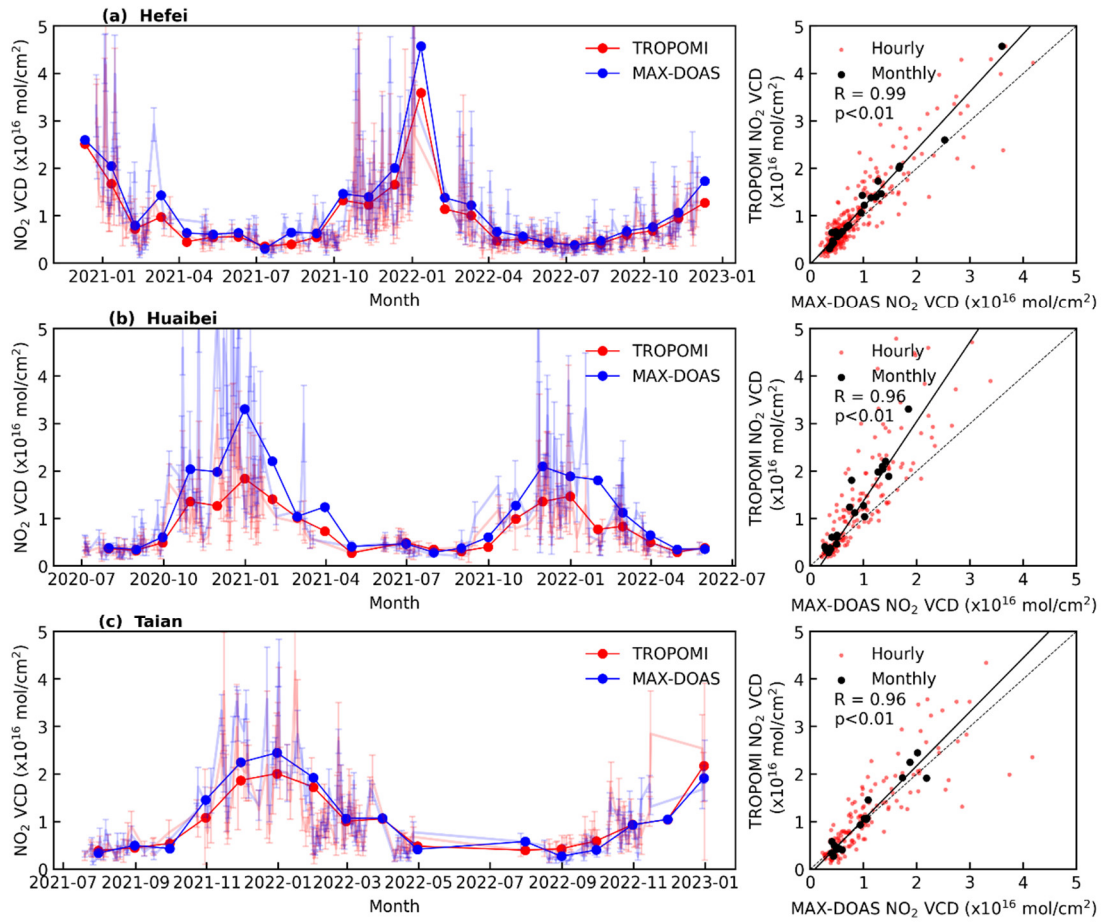

**Fig.S1.** Time series comparison (left panel) and scatter plot comparison (right panel) of monthly mean TROPOMI and MAX-DOAS NO<sub>2</sub> VCD during the whole observation period in (a) Hefei, (b) Huaibei, and (c) Tai'an, respectively. The light red and light blue dots in left panel represent the TROPOMI and MAX-DOAS observed hourly values, respectively, and the solid red and solid blue dots represent the TROPOMI and MAX-DOAS observed monthly mean values, respectively. The vertical bar in hourly values represents errors.

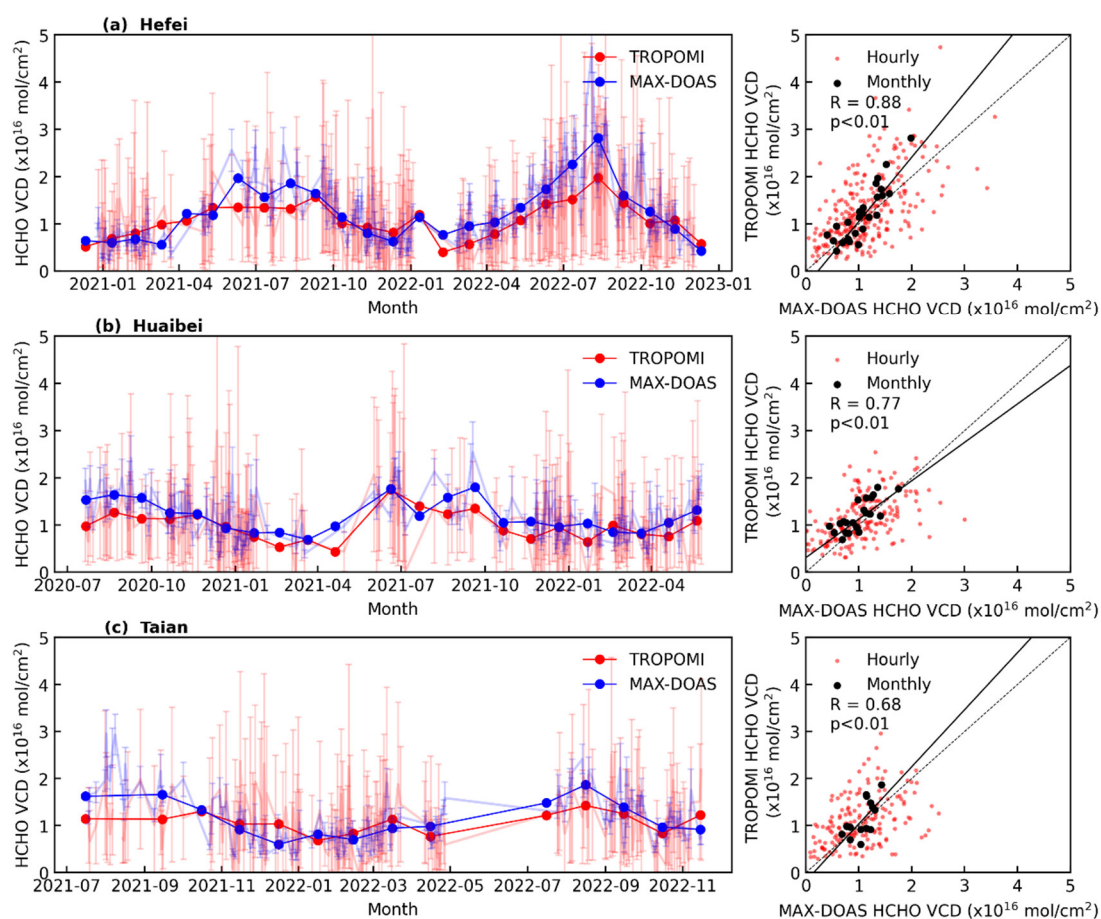

**Fig.S2.** The same as Fig.S1 but for HCHO VCD comparison.

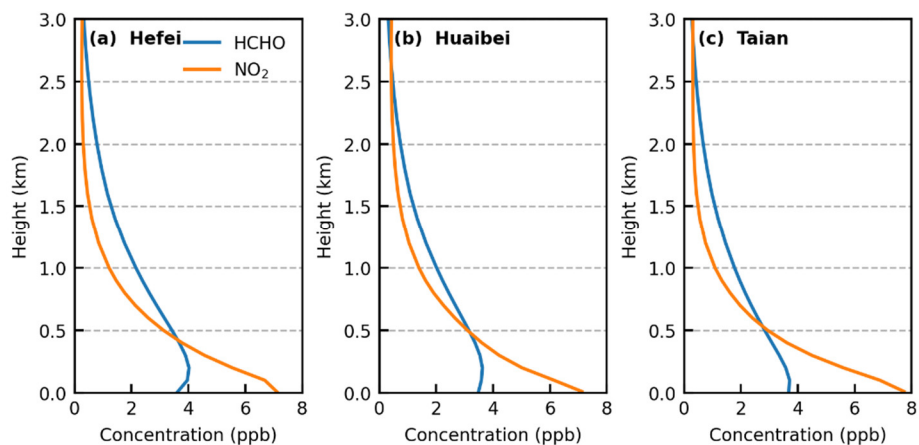

**Fig.S3.** Mean profiles of NO<sub>2</sub> and HCHO concentrations in (a) Hefei, (b) Huaibei, and (c) Tai'an during the whole observation period from May to September.

5

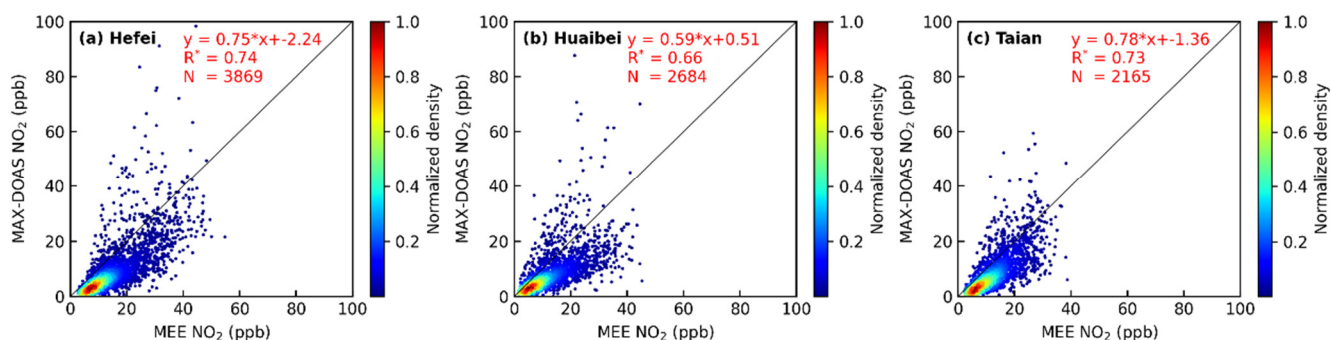

**Fig.S4.** Scatter plots show the correlation between the surface hourly NO<sub>2</sub> concentrations observed by Ministry of Ecology and Environment of China (MEE) and ground-based MAX-DOAS in (a) Hefei, (b) Huaibei, and (c) Tai'an during the whole observation period. The linear fitting function and correlation coefficient are show at the top of each panel, N=number of samples, and the superscript asterisk indicates P<0.01. Here, the color bar indicates the density.

10

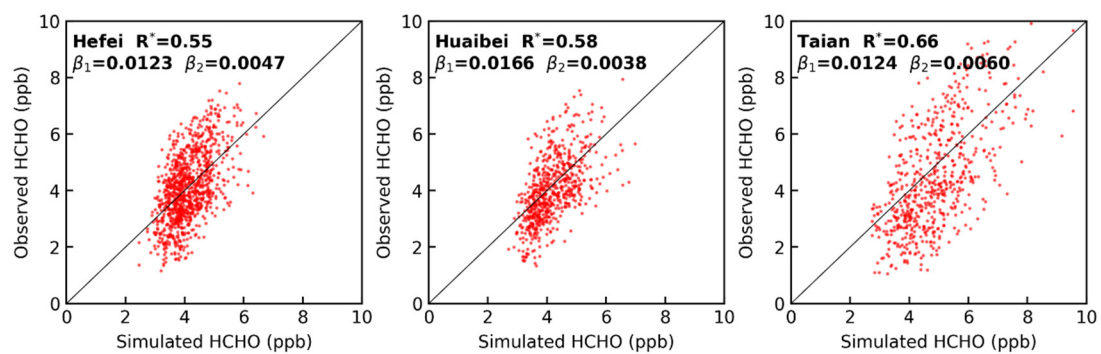

**Fig.S5.** Correlation analysis result of the simulated HCHO from the multi-linear regression model and measured HCHO, and the superscript asterisk indicates  $P < 0.01$ .

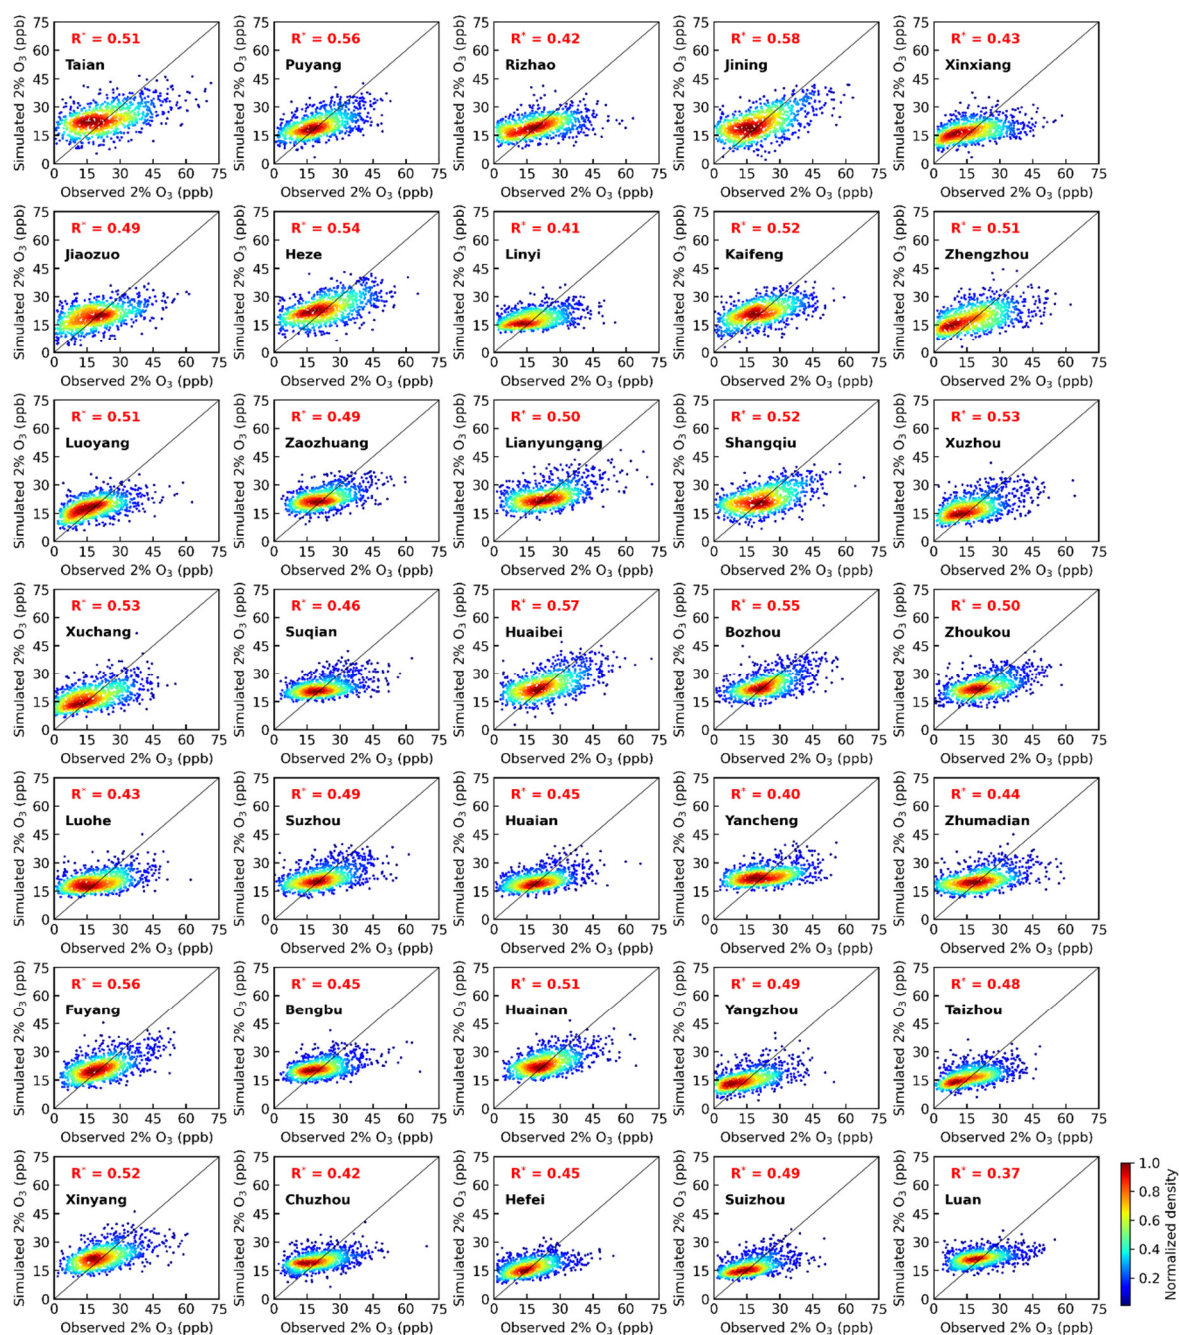

**Fig.S6.** Scatter plots between daily observed 2<sup>nd</sup> O<sub>3</sub> percentile concentrations and daily 2<sup>nd</sup> O<sub>3</sub> percentile concentrations simulated by a stepwise multiple linear regression model driven by three key meteorological factors. The Pearson correlation coefficient is shown at the top of each panel, and the superscript asterisk indicates P<0.01. Here, the color bar indicates the density.



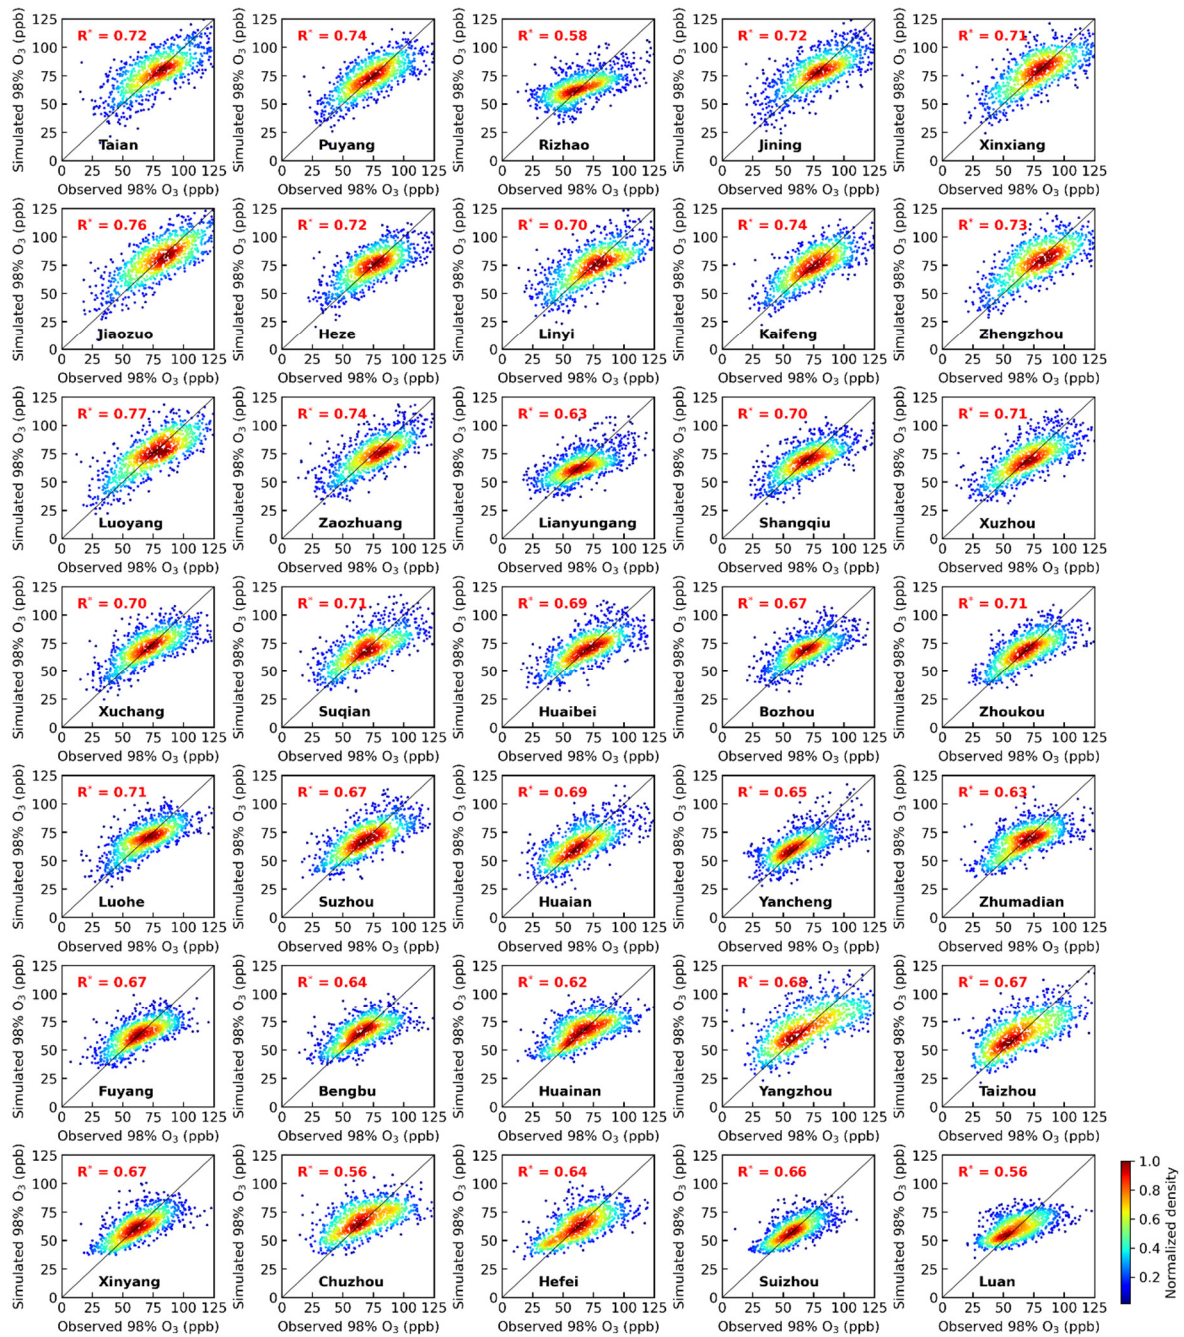

Fig.S7. The same as Fig.S6 but for 98<sup>th</sup> O<sub>3</sub> percentiles.

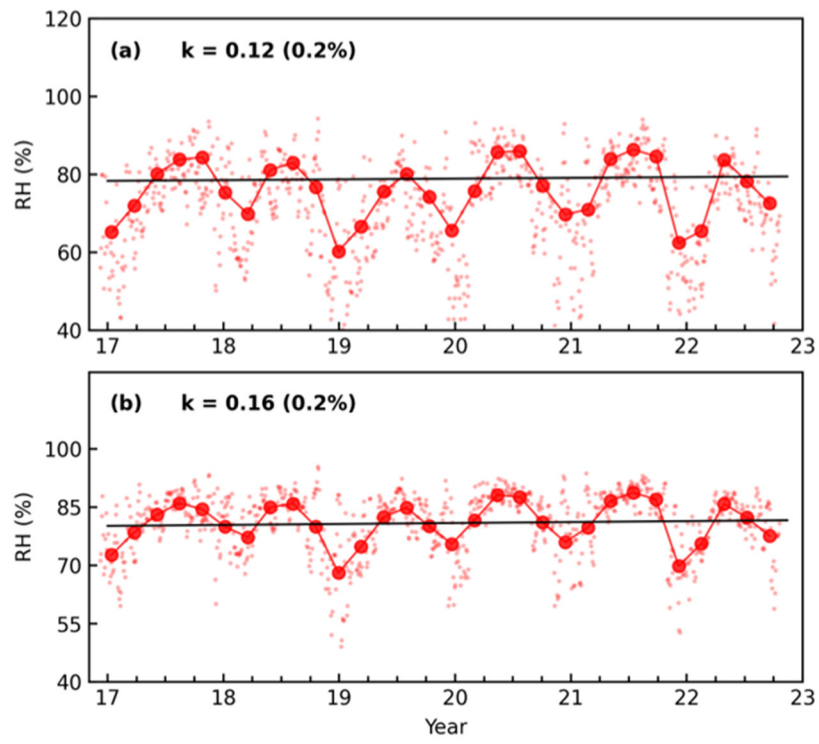

**Fig.S8** Trend of RH in ERA5 reanalysis data over (a) HRB and (b) eastern China during May–September 2017–2022.



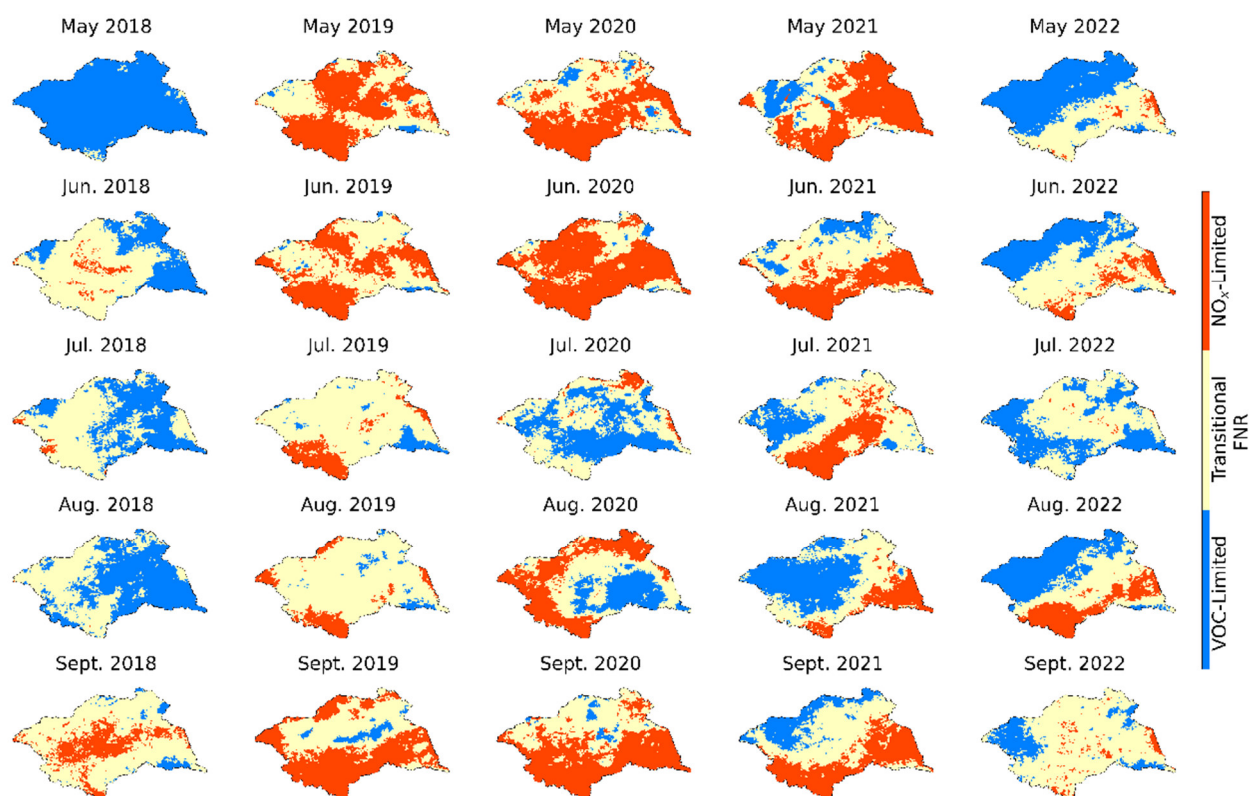

**Fig.S9.** Spatial and temporal variations of monthly mean FNR from May–September 2018–2022. The date is shown at the top of each panel.

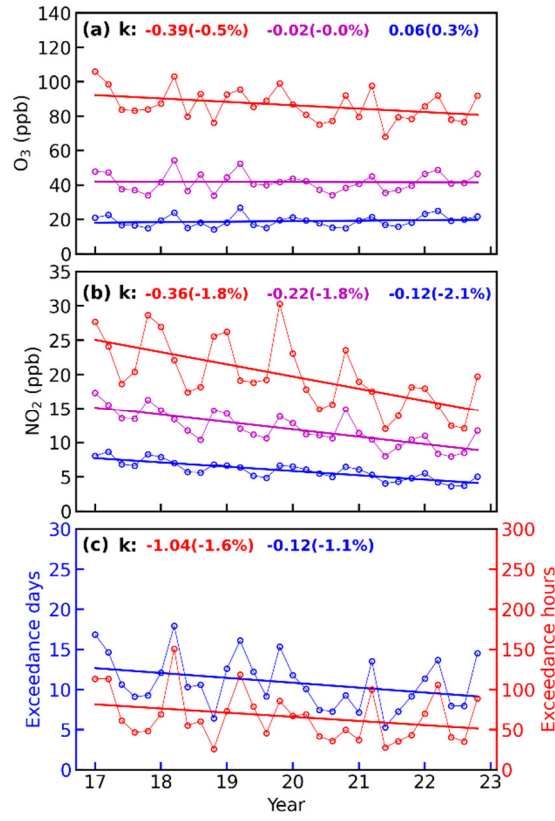

**Fig.S10** Trends of surface (a) O<sub>3</sub>, (b) NO<sub>2</sub>, (c) O<sub>3</sub> exceedance days and O<sub>3</sub> exceedance hours in eastern China during May–September 2017–2022. The red, magenta, and blue solid lines in (a) and (b) indicate the trends for the 98<sup>th</sup>, 50<sup>th</sup>, and 2<sup>nd</sup> percentiles, respectively. The labels on (a) and (b) represent the trends in O<sub>3</sub> and NO<sub>2</sub> for May–September 2017–2022, units: ppb/year. The labels on (c) represent the trends in O<sub>3</sub> exceedance days and O<sub>3</sub> exceedance hours for May–September 2017–2022. The percentage change is indicated in brackets.

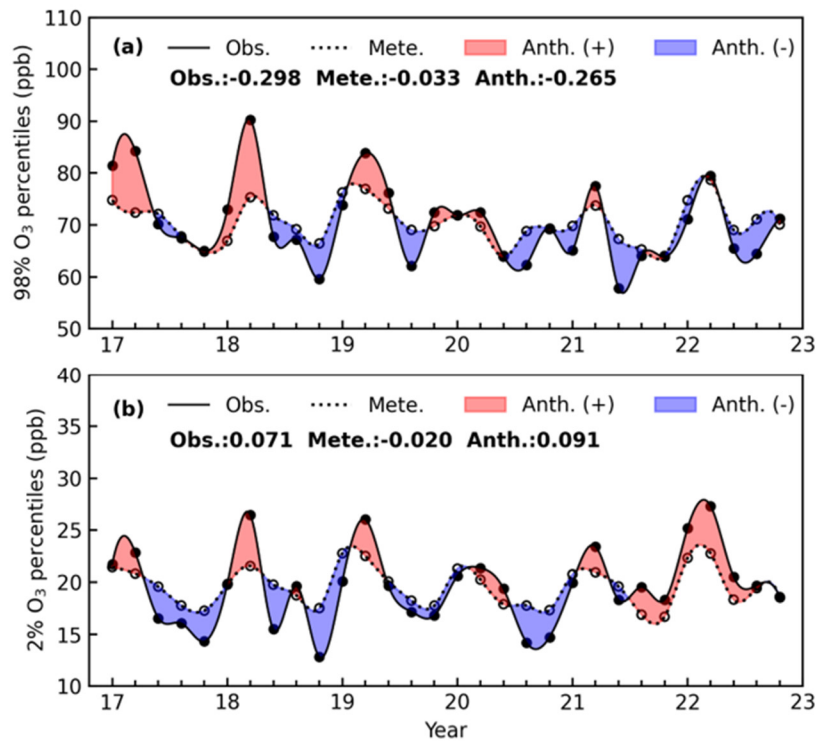

**Fig.S11** Variations in observed (a) 98<sup>th</sup> and (b) 2<sup>nd</sup> O<sub>3</sub> percentiles (solid lines connected by solid black dots), meteorological (a) 98<sup>th</sup> and (b) 2<sup>nd</sup> O<sub>3</sub> percentiles component (dotted lines connect black hollow points) in MLR simulations, and the anthropogenic (a) 98<sup>th</sup> and (b) 2<sup>nd</sup> O<sub>3</sub> percentiles component (red and blue shading) in eastern China during May–September 2017–2022. The labels at the top of each panel represent the trend in observed, meteorological, and anthropogenic components.

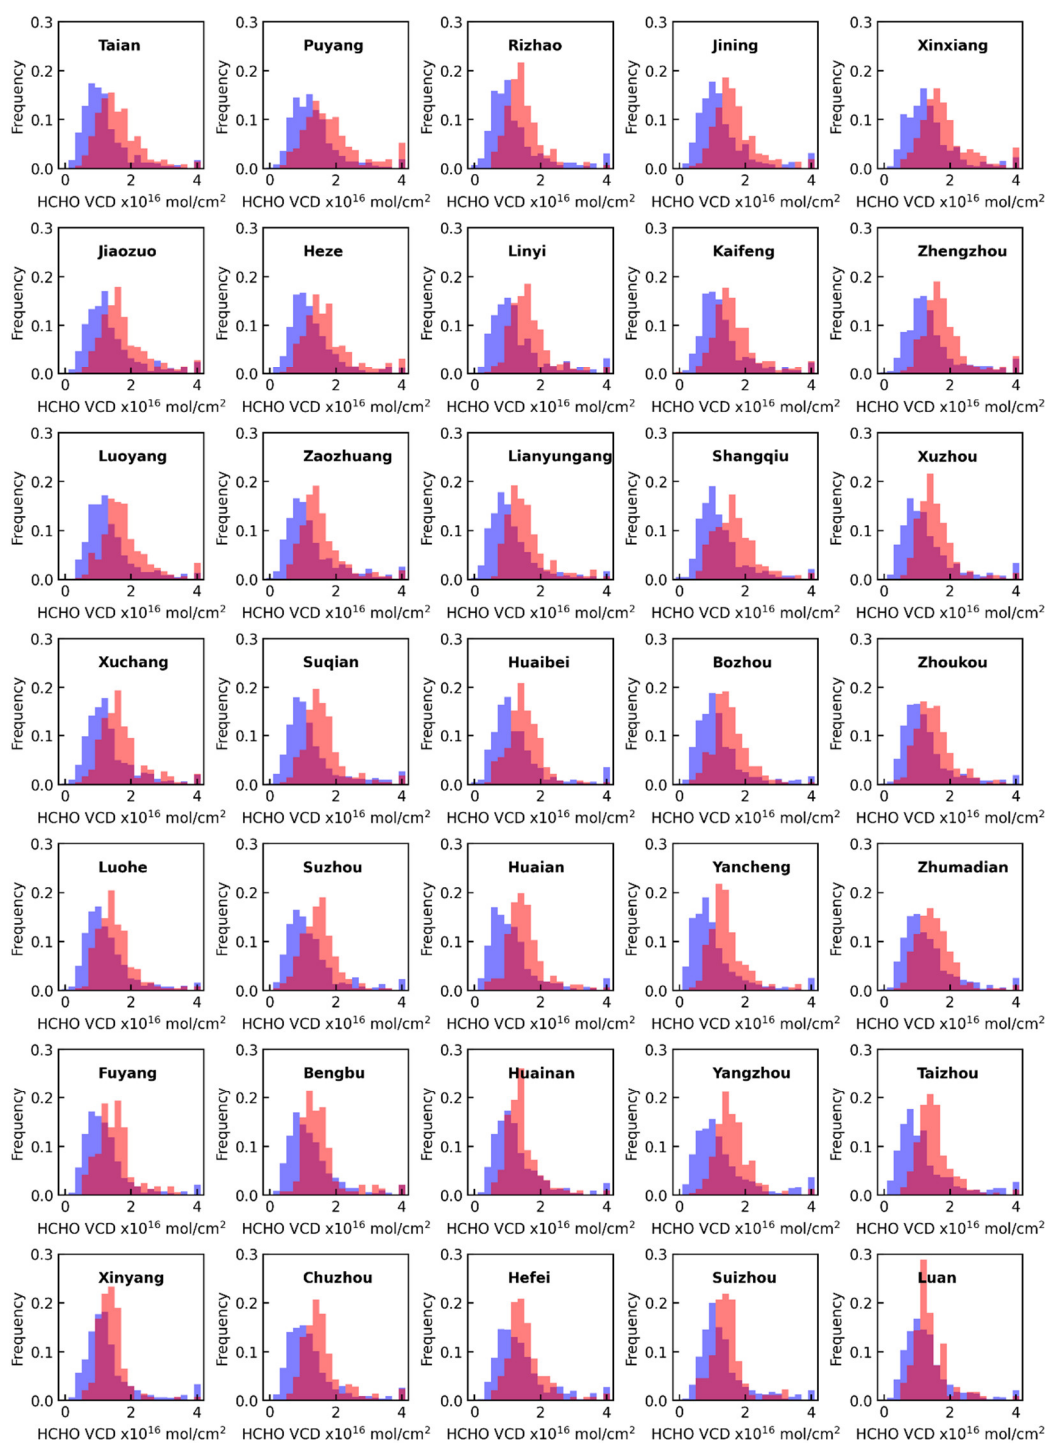

**Fig.S12** Histograms of HCHO VCD for O<sub>3</sub> exceedance days (red) and O<sub>3</sub> normal days (blue) in each city of HRB during May–September 2018–2022. The city name is shown at the top of each panel.

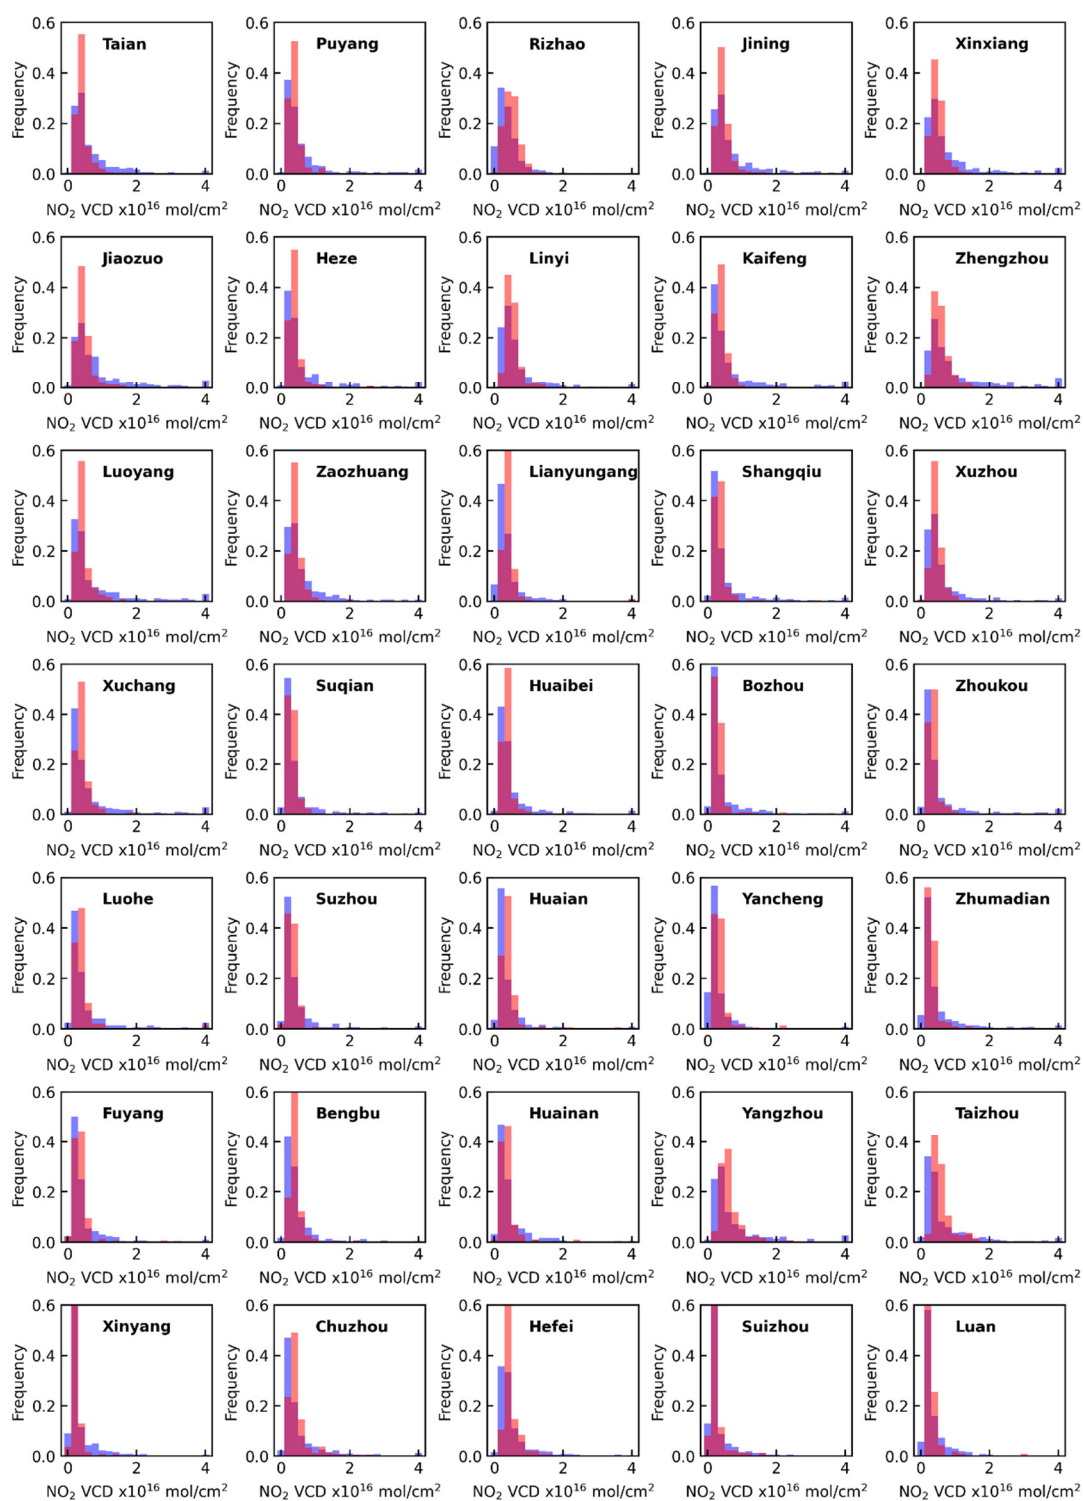

**Fig.S13** The same as Fig.S12 but for NO<sub>2</sub> VCD.



Tables:

| Table S1. Meteorological fields considered as possible 98% O <sub>3</sub> and 2% O <sub>3</sub> covariates |                              |        |                   |                  |
|------------------------------------------------------------------------------------------------------------|------------------------------|--------|-------------------|------------------|
|                                                                                                            | Variables                    | Symbol | Average time (LT) | Units            |
| 98%                                                                                                        | 2–m temperature              | T2     | Maximum           | K                |
|                                                                                                            | Surface relative humidity    | RH     | 24 h              | %                |
|                                                                                                            | Total cloud cover            | TCC    | 08–18 h           | 0-1              |
|                                                                                                            | UV radiation at the surface  | UVB    | 08–18 h           | J/m <sup>2</sup> |
|                                                                                                            | Total precipitation          | TP     | 24 h              | mm               |
|                                                                                                            | Mean sea level pressure      | MSLP   | 24 h              | Pa               |
|                                                                                                            | Wind speed                   | U, V   | 24 h              | m/s              |
|                                                                                                            | Boundary layer height        | BLH    | 08–18 h           | m                |
|                                                                                                            | Vertical velocity at 850 hPa | V850   | 24 h              | m/s              |
| 2%                                                                                                         | 2–m temperature              | T2     | Minimum           | K                |
|                                                                                                            | Surface relative humidity    | RH     | 19–07 h           | %                |
|                                                                                                            | Total precipitation          | TP     | 24 h              | mm               |
|                                                                                                            | Mean sea level pressure      | MSLP   | 24 h              | Pa               |
|                                                                                                            | Wind speed                   | U, V   | 24 h              | m/s              |
|                                                                                                            | Boundary layer height        | BLH    | 19–07 h           | m                |
|                                                                                                            | Vertical velocity at 850 hPa | V850   | 24 h              | m/s              |

5

10

15

20

25

Table S2. Trends of 98<sup>th</sup>, 50<sup>th</sup> and 2<sup>nd</sup> O<sub>3</sub> percentiles, O<sub>3</sub> exceedance hours, and mean NO<sub>2</sub> concentrations in each city of HRB during May–September 2017–2022

|             | O <sub>3</sub> (ppb/year) |                  |                 |                     | NO <sub>2</sub><br>(ppb/year) |
|-------------|---------------------------|------------------|-----------------|---------------------|-------------------------------|
|             | 98 <sup>th</sup>          | 50 <sup>th</sup> | 2 <sup>nd</sup> | Exceedance<br>hours | mean                          |
| Taian       | -0.74(-0.6%)              | -0.24(-0.5%)     | 0.16(1.2%)      | -2.8(-2.2%)         | -0.20(-1.7%)                  |
| Puyang      | -0.72(-0.7%)              | -0.15(-0.3%)     | 0.00(0.0%)      | -2.2(-2.3%)         | -0.21(-1.8%)                  |
| Rizhao      | -0.17(-0.2%)              | -0.12(-0.3%)     | 0.23(2.7%)      | -0.4(-0.9%)         | -0.21(-1.7%)                  |
| Jining      | -0.62(-0.5%)              | -0.21(-0.4%)     | 0.21(1.8%)      | -2.1(-1.7%)         | -0.27(-2.3%)                  |
| Xinxiang    | -0.91(-0.8%)              | -0.10(-0.2%)     | 0.14(1.7%)      | -2.2(-2.0%)         | -0.41(-2.6%)                  |
| Jiaozuo     | -0.87(-0.7%)              | 0.05(0.1%)       | 0.19(1.9%)      | -1.4(-1.1%)         | -0.39(-2.9%)                  |
| Heze        | -0.39(-0.4%)              | 0.02(0.0%)       | 0.25(1.9%)      | -1.0(-1.0%)         | -0.3.0(-2.4%)                 |
| Linyi       | -0.71(-0.6%)              | -0.09(-0.2%)     | 0.05(0.6%)      | -1.6(-1.6%)         | -0.26(-1.9%)                  |
| Kaifeng     | -0.50(-0.5%)              | -0.06(-0.1%)     | 0.21(1.7%)      | -1.3(-1.3%)         | -0.18(-1.7%)                  |
| Zhengzhou   | -0.67(-0.6%)              | 0.04(0.1%)       | 0.29(3.5%)      | -1.6(-1.4%)         | -0.52(-3.0%)                  |
| Luoyang     | -0.68(-0.6%)              | -0.17(-0.4%)     | 0.14(1.4%)      | -2.4(-2.3%)         | -0.32(-2.4%)                  |
| Zaozhuang   | -0.20(-0.2%)              | 0.04(0.1%)       | 0.08(0.6%)      | -0.5(-0.4%)         | -0.02(-0.2%)                  |
| Lianyungang | 0.14(0.2%)                | 0.05(0.1%)       | 0.10(0.7%)      | 0.0(0.0%)           | -0.13(-1.3%)                  |
| Shangqiu    | -0.45(-0.4%)              | 0.10(0.2%)       | 0.22(1.9%)      | -1.3(-1.7%)         | -0.19(-1.9%)                  |
| Xuzhou      | -0.60(-0.6%)              | -0.06(-0.1%)     | 0.12(1.2%)      | -2.0(-2.3%)         | -0.24(-1.8%)                  |
| Xuchang     | -0.84(-0.8%)              | 0.02(0.1%)       | 0.32(3.8%)      | -2(-2.5%)           | -0.36(-2.8%)                  |
| Suqian      | -0.52(-0.5%)              | -0.15(-0.3%)     | 0.07(0.5%)      | -2.2(-2.7%)         | -0.13(-1.4%)                  |
| Huaibei     | -0.64(-0.6%)              | -0.14(-0.3%)     | 0.14(1.0%)      | -2.5(-2.9%)         | -0.26(-2.8%)                  |
| Bozhou      | -0.46(-0.5%)              | -0.08(-0.2%)     | 0.09(0.6%)      | -1.6(-2.1%)         | -0.21(-2.7%)                  |
| Zhoukou     | -0.70(-0.7%)              | -0.07(-0.2%)     | 0.08(0.6%)      | -1.8(-2.4%)         | -0.24(-2.5%)                  |
| Luohe       | -0.30(-0.3%)              | 0.13(0.3%)       | 0.24(2.2%)      | -0.5(-0.7%)         | -0.24(-2.3%)                  |
| Suzhou      | -0.91(-0.9%)              | -0.22(-0.5%)     | 0.12(0.9%)      | -3.0(-3.7%)         | -0.39(-3.8%)                  |
| Huaian      | -0.56(-0.6%)              | -0.03(-0.1%)     | 0.19(1.5%)      | -1.7(-2.9%)         | -0.17(-1.7%)                  |
| Yancheng    | -0.13(-0.1%)              | 0.11(0.3%)       | 0.20(1.4%)      | 0.1(0.2%)           | -0.15(-1.8%)                  |
| Zhumadian   | -0.95(-0.9%)              | -0.03(-0.1%)     | 0.33(3.0%)      | -2.5(-3.7%)         | -0.29(-2.9%)                  |
| Fuyang      | -0.09(-0.1%)              | 0.21(0.5%)       | 0.26(2.0%)      | -0.3(-0.6%)         | -0.24(-2.3%)                  |
| Bengbu      | -0.33(-0.3%)              | -0.02(-0.1%)     | -0.07(-0.5%)    | -1.4(-2.5%)         | -0.30(-2.5%)                  |
| Huainan     | -0.59(-0.6%)              | -0.13(-0.3%)     | 0.04(0.2%)      | -2.3(-3.4%)         | -0.17(-1.9%)                  |
| Yangzhou    | -0.48(-0.4%)              | -0.05(-0.1%)     | 0.08(1.4%)      | -1.5(-1.8%)         | -0.27(-2.0%)                  |
| Taizhou     | -0.52(-0.5%)              | -0.06(-0.1%)     | 0.03(0.3%)      | -1.2(-1.9%)         | -0.22(-2.1%)                  |
| Xinyang     | -0.52(-0.6%)              | 0.03(0.1%)       | 0.15(1.1%)      | -1.0(-2.1%)         | -0.14(-1.9%)                  |
| Chuzhou     | -0.38(-0.4%)              | -0.11(-0.2%)     | -0.01(-0.1%)    | -1.8(-2.5%)         | -0.31(-2.5%)                  |
| Hefei       | -0.71(-0.7%)              | -0.05(-0.1%)     | -0.07(-0.8%)    | -1.9(-3.8%)         | -0.31(-2.0%)                  |
| Suizhou     | -0.21(-0.2%)              | 0.05(0.1%)       | 0.09(1.0%)      | -0.6(-2.2%)         | -0.15(-2.0%)                  |
| Luan        | -0.24(-0.3%)              | 0.00(0.0%)       | -0.10(-0.7%)    | -0.8(-2.0%)         | -0.35(-3.2%)                  |

Table S3. Meteorological drivers of 98% O<sub>3</sub> percentile concentrations in each city of HRB during May–September 2017–2022

|             | Meteorological variable |                 |                 |           | Meteorological variable |                 |                 |
|-------------|-------------------------|-----------------|-----------------|-----------|-------------------------|-----------------|-----------------|
|             | 1 <sup>st</sup>         | 2 <sup>st</sup> | 3 <sup>st</sup> |           | 1 <sup>st</sup>         | 2 <sup>st</sup> | 3 <sup>st</sup> |
| Taian       | T                       | RH              | V               | Bozhou    | RH                      | T               | V850            |
| Puyang      | T                       | RH              | TCC             | Zhoukou   | RH                      | T               | V850            |
| Rizhao      | RH                      | T               | BLH             | Luohe     | RH                      | T               | V850            |
| Jining      | RH                      | T               | TP              | Suzhou    | RH                      | T               | TCC             |
| Xinxiang    | T                       | RH              | TCC             | Huaian    | RH                      | T               | V850            |
| Jiaozuo     | T                       | RH              | U               | Yancheng  | RH                      | T               | U               |
| Heze        | T                       | RH              | MSLP            | Zhumadian | RH                      | T               | V850            |
| Linyi       | T                       | RH              | TCC             | Fuyang    | RH                      | TCC             | U               |
| Kaifeng     | T                       | RH              | TCC             | Bengbu    | RH                      | T               | TCC             |
| Zhengzhou   | T                       | RH              | TCC             | Huainan   | RH                      | T               | V               |
| Luoyang     | T                       | U               | RH              | Yangzhou  | RH                      | T               | V               |
| Zaozhuang   | RH                      | T               | TCC             | Taizhou   | RH                      | V               | V               |
| Lianyungang | RH                      | T               | U               | Xinyang   | RH                      | TCC             | V850            |
| Shangqiu    | RH                      | T               | V850            | Chuzhou   | RH                      | T               | U               |
| Xuzhou      | RH                      | T               | TCC             | Hefei     | RH                      | TCC             | U               |
| Xuchang     | T                       | RH              | V850            | Suizhou   | RH                      | TCC             | U               |
| Suqian      | RH                      | T               | TCC             | Luan      | RH                      | TCC             | U               |
| Huaipei     | RH                      | T               | TCC             | -         | -                       | -               | -               |

5

10

15

20

25

Table S4. Meteorological drivers of 2% O<sub>3</sub> percentile concentrations in each city of HRB during May–September 2017–2022

|             | Meteorological variable |                 |                 |           | Meteorological variable |                 |                 |
|-------------|-------------------------|-----------------|-----------------|-----------|-------------------------|-----------------|-----------------|
|             | 1 <sup>st</sup>         | 2 <sup>st</sup> | 3 <sup>st</sup> |           | 1 <sup>st</sup>         | 2 <sup>st</sup> | 3 <sup>st</sup> |
| Taian       | V850                    | RH              | MSLP            | Bozhou    | RH                      | MSLP            | V850            |
| Puyang      | BLH                     | RH              | T               | Zhoukou   | RH                      | MSLP            | U               |
| Rizhao      | U                       | BLH             | T               | Luohe     | RH                      | BLH             | U               |
| Jining      | RH                      | T               | V               | Suzhou    | RH                      | U               | MSLP            |
| Xinxiang    | BLH                     | T               | RH              | Huaian    | RH                      | U               | MSLP            |
| Jiaozuo     | U                       | RH              | T               | Yancheng  | RH                      | U               | MSLP            |
| Heze        | RH                      | MSLP            | V850            | Zhumadian | RH                      | BLH             | MSLP            |
| Linyi       | RH                      | BLH             | U               | Fuyang    | RH                      | MSLP            | BLH             |
| Kaifeng     | RH                      | U               | MSLP            | Bengbu    | RH                      | MSLP            | U               |
| Zhengzhou   | BLH                     | RH              | T               | Huainan   | RH                      | MSLP            | BLH             |
| Luoyang     | BLH                     | MSLP            | RH              | Yangzhou  | V                       | RH              | BLH             |
| Zaozhuang   | RH                      | T               | U               | Taizhou   | T                       | V               | RH              |
| Lianyungang | RH                      | V850            | U               | Xinyang   | RH                      | MSLP            | BLH             |
| Shangqiu    | RH                      | T               | V               | Chuzhou   | RH                      | V850            | U               |
| Xuzhou      | RH                      | BLH             | T               | Hefei     | RH                      | BLH             | MSLP            |
| Xuchang     | BLH                     | RH              | U               | Suizhou   | BLH                     | RH              | U               |
| Suqian      | RH                      | MSLP            | U               | Luan      | RH                      | MSLP            | T               |
| Huaibei     | RH                      | U               | V               | -         | -                       | -               | -               |

5

10

15

20

25
