# Supplementary material for: Opposite variations of peak and low ozone concentrations in eastern China: Positive effects of NO x control on ozone pollution
Source: Copernicus journal article supplement (doi:10.5194/egusphere-2024-341), 2024-04-30
Supplement: Supplementary file [file egusphere-2024-341-AC2-supplement.pdf]

## Response to Reviewer 2 Comments

Thank you for your decision and constructive comments on my manuscript. We have revised the manuscript carefully according to the reviewers' comments. Point-to-point responses are given below. The original comments are black in color, while our responses are in blue. The revised parts in the manuscript are marked in red. All the page number and line number are referred to the revised manuscript.

### Major concerns:

**Point 1:** How to interpret the variations of low ozone concentrations / background ozone for the targeted region as it's surrounded by polluted areas?

**Response 1:** In principle, the lowest daily O<sub>3</sub> concentrations usually occur before sunrise due to nighttime titration of NO, and the low percentile (2<sup>nd</sup>) usually characterizes baseline or background conditions because increases in the low O<sub>3</sub> percentile tend to be associated with increases in baseline or background O<sub>3</sub> concentrations. Similar conclusions were also obtained from both models and observations (Jacob et al., 1999; Cynthia Lin et al., 2000). Li et al. (2014) reported that concentrations below the 5<sup>th</sup>, between 25<sup>th</sup> and 75<sup>th</sup>, and above 95<sup>th</sup> represent background, typical, and polluted concentrations, respectively. Thus, in our manuscript, low O<sub>3</sub> concentration levels were determined by the 2<sup>nd</sup> percentiles of hourly O<sub>3</sub> concentrations in each month for cities in eastern China (Li et al., 2022; Cooper et al., 2012; Gaudel et al., 2020). Based on the 2<sup>nd</sup> O<sub>3</sub> percentile concentrations, we explore the driving forces of the low O<sub>3</sub> trends in eastern China in recent years. Firstly, the Multiple Linear Regression (MLR) model is used to evaluate the anthropogenic and meteorological contributions to the 98<sup>th</sup> and 2<sup>nd</sup> O<sub>3</sub> percentile trends. Then, we discuss the impacts of meteorological factors and anthropogenic emissions on low O<sub>3</sub> concentrations, including the impact of the COVID-19 pandemic, and sustained heatwave of extremely hot and dry summer in eastern China in 2022, respectively, and detailed information can be found in the discussion section of the manuscript.

**Point 2:** How to identify the ozone formation sensitivity based on FNR (ratio of formaldehyde and NO<sub>2</sub>).

**Response 2:** This method belongs to one of the photochemical indicator diagnostics of O<sub>3</sub> formation sensitivity (Chu et al., 2024), and the FNR is the ratio of the volume concentration of HCHO to NO<sub>2</sub>. HCHO is a transient product reflecting the oxidation of various VOCs, serving as a proxy for VOCs emissions, as used in previous studies (Zheng et al., 2018; Zhang

et al., 2019). The ratio of  $\text{NO}_2$  to  $\text{NO}$  in  $\text{NO}_x$  is relatively constant, and the  $\text{NO}_2$  concentration can represent the evolution process of atmospheric  $\text{NO}_x$ . Therefore,  $\text{HCHO}$  and  $\text{NO}_2$  can be taken as representatives of VOCs and  $\text{NO}_x$ , respectively. This photochemical indicator was originally derived from the photochemical indicator  $\text{HCHO}/\text{NO}_y$  (the ratio of  $\text{HCHO}$  and  $\text{NO}_y$  volume concentrations). Jin et al. (2017) suggested that FNR is better suited than  $\text{HCHO}/\text{NO}_y$  for determining  $\text{O}_3$  formation sensitivity because both  $\text{HCHO}$  and  $\text{NO}_2$  have short lifetimes (about a few hours), and their ratios can better represent the competition between OH radicals and the reaction between VOCs and  $\text{NO}_2$ .

This photochemical indicator has been widely used not only in the analysis of ground-based observations, but also in satellite observations, and Martin et al. (2004) were the first to propose the diagnosis of  $\text{O}_3$  formation sensitivity based on satellite observations of FNR. Currently, this method has been refined and extended to various  $\text{O}_3$  monitoring instrument products (Ren et al., 2022; Chang et al., 2016), such as OMI (Ozone Monitoring Instrument), TROPOMI (Tropospheric Monitoring Instrument) and GEMS (Geostationary Environment Monitoring Spectrometer).

The reliability of surface FNR in the diagnosis of  $\text{O}_3$  formation sensitivity was recently assessed by Liu et al. (2021). Based on a joint analysis of multiple in situ observations and model simulations, the validity of FNR in diagnosing  $\text{O}_3$  formation sensitivity was determined based on the relative changes in  $\text{O}_3$  generation rates with respect to several indicators. Lin et al. (2022) further extended the FNR to the vertical distribution and diagnosed the  $\text{O}_3$  formation sensitivity at different altitude using vertical profile of  $\text{NO}_2$  and  $\text{HCHO}$  observed by Multi-Axis Differential Absorption Spectrometer (MAX-DOAS), and the methodology employed in our manuscript is consistent with that of Lin et al (2022).

The advantage of this method is that  $\text{O}_3$  formation sensitivities can be quickly determined from photochemical indicators. However, the threshold value of FNR is always the core problem in the application of this method, and its threshold value will change with different environmental conditions, especially the thresholds in different regions tend to differ greatly. Therefore, there are differences in the thresholds reported in different literatures.

Three steps are involved in determining the  $\text{FNR}_{\text{sec}}$  threshold. First, the surface-hourly averaged secondary  $\text{HCHO}$  and  $\text{NO}_2$  VMRs during May–September based on MAX-DOAS observations were normalized by dividing their respective mean values because of the large differences in surface  $\text{HCHO}$  and  $\text{NO}_2$  concentrations (Ren et al., 2022). The ratio of the hourly averaged  $\text{O}_3$  VMRs to the hourly averaged normalized  $\text{NO}_2$  VMRs ( $S_{\text{NO}_2}$ ) and the ratio of the hourly averaged  $\text{O}_3$  VMRs to the hourly averaged normalized secondary  $\text{HCHO}$  VMRs ( $S_{\text{HCHO}}$ )

were calculated. Finally, third-order polynomials were used to fit  $S_{NO_2}$  and  $S_{HCHO}$  (Fig. R1). When  $S_{NO_2}$  is significantly larger than  $S_{HCHO}$ ,  $O_3$  formation is more sensitive to  $NO_x$  (larger  $FNR_{sec}$ ), which is the  $NO_x$ -limited regime, and vice versa. For example, in Hefei,  $S_{NO_2}$  and  $S_{HCHO}$  intersected at  $FNR_{sec}=0.21$ .  $FNR_{sec}$  less than 0.16 and greater than 0.29 correspond to VOC-limited regime and  $NO_x$ -limited regime, respectively, where the relative difference between  $S_{NO_2}$  and  $S_{HCHO}$  is more than 25% (Lin et al., 2022), and the range of  $FNR_{sec}$  from 0.16 to 0.29 represents a transition regime.

In addition, following the referee's suggestion, the manuscript was edited by Elsevier Language Editing Services (please see the following Elsevier certificate).

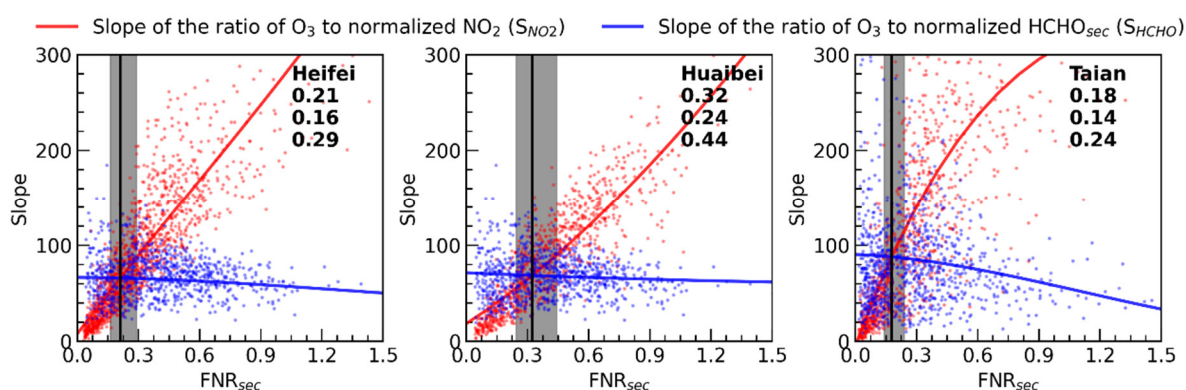

**Fig.R1.** Three-order fitting of slopes of  $O_3$  VMRs versus normalized  $NO_2$  VMRs and slopes of  $O_3$  VMRs versus normalized secondary HCHO VMRs in different  $FNR_{sec}$  values in Hefei, Huaibei, and Tai'an during May–September based on MAX–DOAS observations. The intersect at  $FNR_{sec}$  indicated by the black solid line. The vertical shadow indicates the relative difference between the slopes of  $O_3$  VMRs versus normalized  $NO_2$  VMRs and slopes of  $O_3$  VMRs versus secondary HCHO VMRs within 25% (transition regime). The labels at the top right of each panel represent the intersect  $FNR_{sec}$  values and the thresholds for the  $NO_x$ -limited regime (high) and VOC-limited regime (low) in Hefei, Huaibei, and Tai'an, respectively.

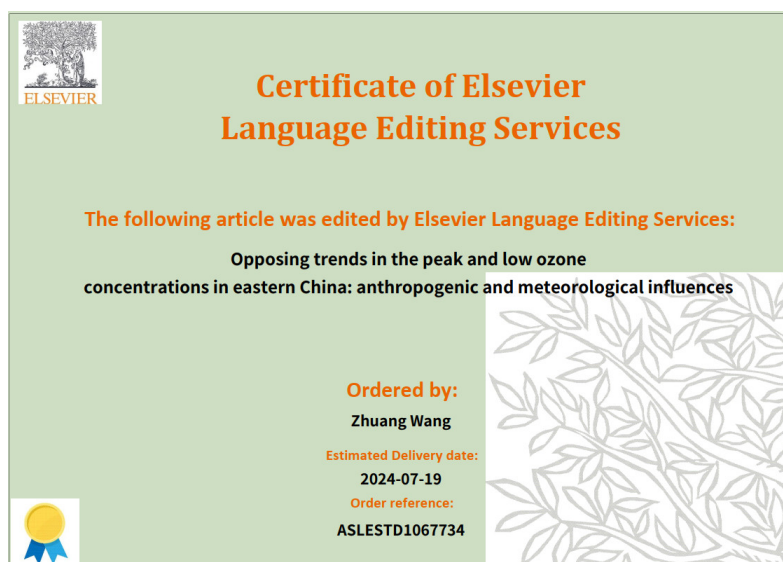

**Fig. R2** Certificate of Elsevier language editing services

### **Detailed comments:**

1. Page 1, Line 27: in the main text, you mainly work on “HRB”, instead of the whole eastern China. Maybe specifying HRB, instead of eastern China makes more sense.

Thanks for your suggestion. This study attempts to reveal the surface low and peak O<sub>3</sub> trends in eastern Chinese cities in recent years, and to explore the driving forces behind these trends. The surface observations show that the decreased trend in low O<sub>3</sub> concentrations and increased trend in peak O<sub>3</sub> concentrations are widespread in urban agglomerations in eastern China. In the original manuscript, we first analyzed the trend of low and peak O<sub>3</sub> values in the HRB, which were then extended to eastern China. In fact, we conducted MAX–DOAS measurements in three cities in eastern China, namely Hefei, Huaibei and Tai'an (Fig.R3). First, the three cities are located at similar longitudes with large differences in latitude, transitioning sequentially from south to north. Secondly, the O<sub>3</sub> concentrations of the three cities differed greatly, with Tai'an having a higher surface mean MDA8 O<sub>3</sub> concentration (82.9 ppb), Hefei having a lower surface mean MDA8 O<sub>3</sub> concentration (65.5 ppb), and Huaibei having an intermediate surface mean MDA8 O<sub>3</sub> concentration (74.3 ppb). Therefore, Hefei, Huaibei and Tai'an can be taken as representative of the 105 cities in eastern China to conduct O<sub>3</sub> precursor observations. In the new manuscript, we have deleted the analysis of the HRB and reorganized the manuscript.

The new manuscript mainly includes four parts. First, we report long-term records of surface O<sub>3</sub> and related parameters observed at urban air quality monitoring sites and by satellites in eastern China, characterizing the trends of low, typical, and peak surface O<sub>3</sub>

concentrations during the warm season (May–September) from 2017 to 2022. Then, a Multiple Linear Regression (MLR) model is used to evaluate the anthropogenic and meteorological contributions to the 98<sup>th</sup> and 2<sup>nd</sup> O<sub>3</sub> percentile trends. Next, secondary formaldehyde (HCHO) and NO<sub>2</sub> are employed to diagnose the diurnal variations in O<sub>3</sub> formation sensitivity and investigate the reasons for peak O<sub>3</sub> concentration trends in the context of current NO<sub>x</sub> reduction. Finally, we discuss the reasons for the potential increase in low O<sub>3</sub> concentrations and the sensitivity of peak and low O<sub>3</sub> trends during the study period. Please refer to our new manuscript for details.

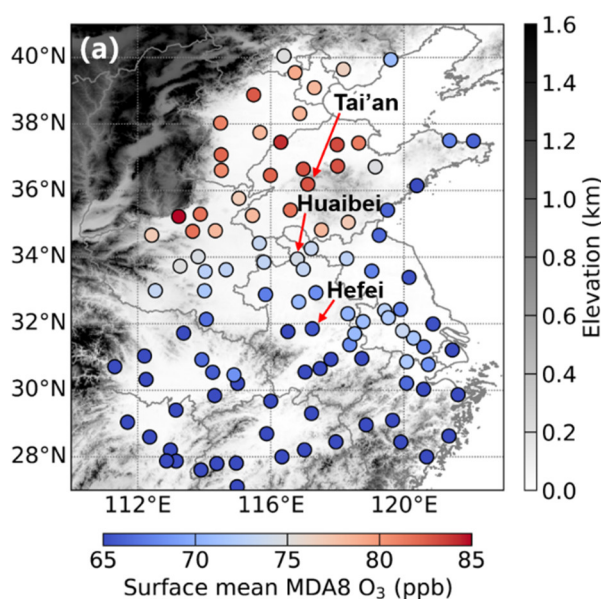

**Fig.R3.** Spatial distributions of surface mean MDA8 O<sub>3</sub> concentrations during May–September 2017–2022. The red arrow indicates the name of each city, which are equipped with ground–based MAX–DOAS observations

2. Page 1, Line 29: can you elaborate more on the “typical” ozone concentrations?

Thanks for your suggestion. We have followed this suggestion and elaborated more on the “typical” O<sub>3</sub> concentrations. “The decline in typical O<sub>3</sub> concentrations is notably slower than that of peak O<sub>3</sub> concentrations, approximately -0.02 ppb/year (-0.0% per year) during the same period.”. Please refer to Page 1 Line 31–32 in the manuscript.

3. Page 1, Line 31: please rephrase the sentence. “Anthropogenic emissions” is not the “cause” of the ozone trends, maybe “driving force” is better.

Thanks for pointing out the unsuitable expression. We have followed this suggestion and corrected it. Please refer to Page 1 Line 33 in the manuscript.

4. Page 2, Line 3: change “on spatial scales” to “spatially”.

Thanks for pointing out the unsuitable expression. We have followed this suggestion and removed relevant expressions based on the new abstract.

5. Page 3, Line 5: duplicate reference of Li et al., 2020a

Thanks for pointing out the inappropriate quote, we have corrected it.

6. Page 5, line 18: have you applied consistent AMF (air mass factor) between MAX-DOAS and TROPOMI for NO<sub>2</sub> VCDs?

We did not apply consistent AMF (air mass factor) between MAX-DOAS and TROPOMI for NO<sub>2</sub> VCDs. NO<sub>2</sub> VCDs observed by TROPOMI was downloaded directly from <https://search.earthdata.nasa.gov/search> (last access: 1 July, 2024). The AMF calculation for MAX-DOAS is a two-step process that first retrieves the atmospheric aerosol vertical profile and then inputs the aerosol vertical profile into the radiative transfer model SCIATRAN, to compute the atmospheric photon paths that are used to convert the NO<sub>2</sub> slanting column concentration into a vertical column concentration (Xing et al., 2017).

7. Page 5, Line 21: why the differences of sensitivity peaks between TROPOMI and MAX-DOAS lead to different HCHO VCD retrievals?

TROPOMI is a space-borne instrument to observe the atmospheric trace gas column concentration from the top down, while MAX-DOAS is a ground-based spectrometer to observe the atmospheric trace gas column concentration from the bottom up. TROPOMI sensitivity peaks in the upper troposphere, which rapidly drops in the atmospheric layers lower than 3 km (Vigouroux et al., 2020), while MAX-DOAS shows an opposite sensitivity that is maximal at the surface and generally becomes negligible above 3 km (De Smedt et al., 2021; Wang et al., 2019). The HCHO concentrations usually concentrated below 2 km over the polluted city (Fig.R4). Therefore, TROPOMI may underestimate the HCHO concentration below 3 km, resulting in a smaller retrieved HCHO VCD. Similar comparative results are also seen in other cities around the world (De Smedt et al., 2021).

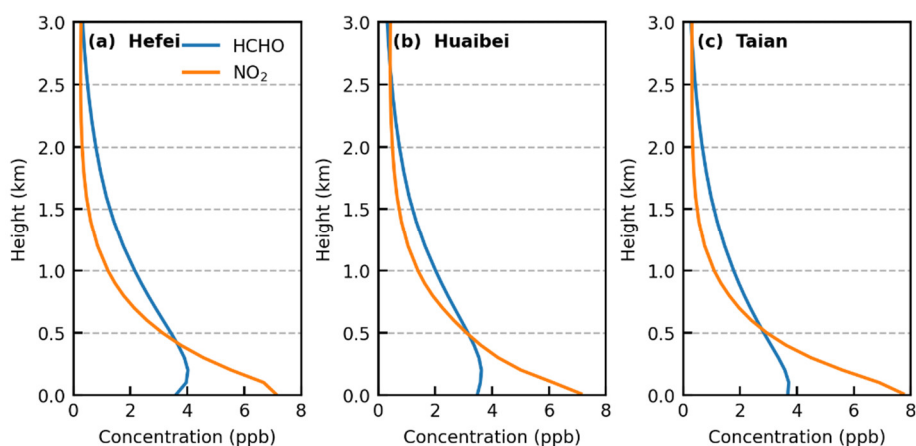

**Fig.R4.** Mean profiles of NO<sub>2</sub> and HCHO concentrations in (a) Hefei, (b) Huaibei, and (c) Tai'an during the whole observation period from May to September.

8. Page 5, Line 24-26: so, what's the conclusion? Are MAX-DOAS data not reliable compared to MEE, as the correlation coefficients are not that high (0.66~0.74)? Please specify it.

The MAX-DOAS data are reliable. Although the correlation coefficients are not that high (0.66~0.74), were also comparable to the comparisons reported in previous studies (Lin et al., 2022; Wang et al., 2020). The differences between MAX-DOAS and MEE observations arise from these two components. First, there was a difference in the detection geometries, as the urban NO<sub>2</sub> concentration observed by MAX-DOAS was the result of scanning along a certain direction, whereas the urban NO<sub>2</sub> concentration observed by MEE was sampled in situ. Second, there were some differences in their locations, and the urban NO<sub>2</sub> concentration of the MEE was the average of several in-situ observation stations (10, 3, and 3 in Hefei, Huaibei, and Tai'an, respectively), whereas we only used one MAX-DOAS in each city. We have added this statement to the manuscript, please refer to Page 5 Line 4-10.

9. Page 6, line 27: this is not true for summer, as VOCs can be dominated by biogenic sources. Thanks for pointing out the unsuitable expression. We have followed this suggestion and removed relevant expressions.

10. Page 6, Line 28: how about transport from surrounding areas? Especially in HRB, the transport cannot be neglected as it's surrounded by the YRD and Jing-Jin-Ji regions. Please elaborate more.

The effect of transport is included in the meteorological factors, and we considered the effect of horizontal transport (wind speed of u and v components) as well as vertical exchange rates

(vertical velocity at 850 hPa) in MLR fitting. The results also show that horizontal winds and vertical exchange rates are also a key meteorological factor affecting O<sub>3</sub> concentrations in many cities in eastern China (Table R1 and R2). The effect of horizontal winds can be seen in two aspects, one is that strong winds blow away high concentrations of O<sub>3</sub> and its precursors, and the other is that they bring high concentrations of O<sub>3</sub> and its precursors. We also discuss this result in detail in the Discussion section of the manuscript as well. Please refer to Page 14 Line 20–30.

**Table R1.** Meteorological drivers of 2% O<sub>3</sub> percentile and Pearson correlation coefficient between observed and modeled 2% O<sub>3</sub> percentile in each city of eastern China during May–September 2017–2022

|              | Meteorological variable |                 |                 |      |              | Meteorological variable |                 |                 |      |
|--------------|-------------------------|-----------------|-----------------|------|--------------|-------------------------|-----------------|-----------------|------|
|              | 1 <sup>st</sup>         | 2 <sup>st</sup> | 3 <sup>st</sup> | R    |              | 1 <sup>st</sup>         | 2 <sup>st</sup> | 3 <sup>st</sup> | R    |
| Taian        | T                       | RH              | U               | 0.35 | Beijing      | U                       | RH              | T               | 0.23 |
| Puyang       | T                       | BLH             | RH              | 0.50 | Tianjing     | U                       | T               | RH              | 0.32 |
| Rizhao       | U                       | V               | T               | 0.46 | Baoding      | U                       | RH              | TP              | 0.27 |
| Jining       | RH                      | T               | V               | 0.54 | Lanfang      | U                       | T               | V               | 0.23 |
| Xinxiang     | U                       | RH              | V               | 0.41 | Shijiazhuang | RH                      | BLH             | U               | 0.27 |
| Jiaozuo      | T                       | RH              | U               | 0.39 | Handan       | RH                      | V               | BLH             | 0.20 |
| Heze         | RH                      | T               | V               | 0.47 | Qinghuangdao | V                       | U               | RH              | 0.32 |
| Linyi        | RH                      | U               | TP              | 0.40 | Cangzhou     | BLH                     | T               | MSLP            | 0.28 |
| Kaifeng      | RH                      | U               | T               | 0.49 | Xingtai      | RH                      | BLH             | U               | 0.17 |
| Zhengzhou    | BLH                     | RH              | U               | 0.47 | Hengshui     | T                       | V               | RH              | 0.28 |
| Luoyang      | BLH                     | RH              | V               | 0.16 | Tangshan     | U                       | V               | RH              | 0.20 |
| Zaozhuang    | RH                      | T               | U               | 0.46 | Jinan        | V                       | BLH             | RH              | 0.59 |
| Lianyungang  | RH                      | V850            | U               | 0.37 | Qingdao      | V                       | BLH             | RH              | 0.26 |
| Shangqiu     | RH                      | T               | V               | 0.48 | Zibo         | V                       | BLH             | RH              | 0.59 |
| Xuzhou       | RH                      | BLH             | V               | 0.48 | Dongying     | U                       | V               | V850            | 0.36 |
| Xuchang      | BLH                     | RH              | U               | 0.53 | Yantai       | V                       | BLH             | U               | 0.33 |
| Suqian       | RH                      | T               | MSLP            | 0.40 | Weifang      | BLH                     | T               | U               | 0.34 |
| Huaibei      | RH                      | U               | BLH             | 0.59 | Weihai       | RH                      | U               | MSLP            | 0.36 |
| Pingdingshan | BLH                     | RH              | U               | 0.57 | Dezhou       | RH                      | V               | BLH             | 0.40 |
| Bozhou       | RH                      | V               | T               | 0.49 | Liaocheng    | BLH                     | V               | RH              | 0.48 |
| Zhoukou      | RH                      | U               | T               | 0.49 | Binzhou      | BLH                     | T               | V               | 0.23 |
| Luohe        | RH                      | U               | MSLP            | 0.45 | Shaoxing     | RH                      | BLH             | T               | 0.59 |
| Suzhou       | RH                      | U               | BLH             | 0.50 | Jinhua       | RH                      | TP              | V               | 0.60 |
| Huaian       | RH                      | V               | TP              | 0.42 | Taizhou      | V                       | RH              | U               | 0.54 |
| Yancheng     | V                       | RH              | BLH             | 0.37 | Ningbo       | RH                      | V               | TP              | 0.48 |
| Nanyang      | RH                      | U               | BLH             | 0.67 | Wuhan        | RH                      | V               | BLH             | 0.61 |
| Zhumadian    | RH                      | TP              | BLH             | 0.52 | Changsha     | RH                      | V               | BLH             | 0.71 |
| Fuyang       | RH                      | V               | U               | 0.64 | Jingzhou     | RH                      | V               | BLH             | 0.55 |
| Bengbu       | RH                      | BLH             | U               | 0.36 | Yueyang      | RH                      | BLH             | V               | 0.60 |
| Huainan      | RH                      | BLH             | U               | 0.56 | Zhuzhou      | RH                      | V               | BLH             | 0.73 |
| Xinyang      | RH                      | TP              | T               | 0.63 | Xiangtan     | RH                      | V               | BLH             | 0.72 |
| Suizhou      | RH                      | BLH             | U               | 0.63 | Yichang      | RH                      | U               | V850            | 0.64 |
| Shanghai     | RH                      | V               | TP              | 0.55 | Yiyang       | RH                      | V               | BLH             | 0.67 |
| Nanjing      | V                       | RH              | T               | 0.40 | Changde      | V                       | BLH             | RH              | 0.59 |
| Wuxi         | RH                      | V               | BLH             | 0.57 | Jingmen      | V                       | RH              | U               | 0.63 |
| Changzhou    | V                       | RH              | TP              | 0.49 | Huangshi     | RH                      | U               | V850            | 0.72 |
| Suzhou       | RH                      | V               | T               | 0.52 | Huanggang    | RH                      | U               | V850            | 0.77 |
| Nantong      | V                       | RH              | U               | 0.62 | Xianning     | RH                      | U               | MSLP            | 0.74 |



|           |    |    |     |      |            |      |      |      |      |
|-----------|----|----|-----|------|------------|------|------|------|------|
| Yangzhou  | V  | RH | T   | 0.52 | Xiaogan    | RH   | V850 | BLH  | 0.68 |
| Zhenjiang | V  | RH | T   | 0.55 | Quzhou     | V    | RH   | U    | 0.68 |
| Taizhou   | V  | RH | T   | 0.59 | Lishui     | RH   | V    | T    | 0.70 |
| Luan      | RH | V  | T   | 0.24 | Wenzhou    | RH   | V    | U    | 0.63 |
| Hangzhou  | RH | V  | BLH | 0.53 | Jiujiang   | V    | RH   | MSLP | 0.58 |
| Jiaxing   | RH | V  | T   | 0.45 | Nanchang   | V    | RH   | V850 | 0.67 |
| Huzhou    | V  | RH | U   | 0.61 | Jingdezhen | BLH  | V850 | T    | 0.59 |
| Hefei     | RH | TP | V   | 0.37 | Shangrao   | V850 | BLH  | RH   | 0.65 |
| Wuhu      | V  | TP | U   | 0.46 | Yingtian   | BLH  | V850 | RH   | 0.64 |
| Maanshan  | V  | U  | TP  | 0.45 | Yichun     | V850 | U    | T    | 0.63 |
| Tonglin   | V  | T  | TP  | 0.50 | Fuzhou     | RH   | V    | BLH  | 0.72 |
| Anqing    | V  | T  | TP  | 0.56 | Jian       | BLH  | U    | RH   | 0.57 |
| Chuzhou   | RH | V  | BLH | 0.44 | Xinyu      | BLH  | V    | U    | 0.62 |
| Chizhou   | RH | V  | BLH | 0.47 | Pingxiang  | V850 | BLH  | T    | 0.61 |
| Xuancheng | T  | RH | U   | 0.27 | -          | -    | -    | -    | -    |

**Table R2.** Meteorological drivers of 98% O<sub>3</sub> percentile and Pearson correlation coefficient between observed and modeled 98% O<sub>3</sub> percentile in each city of eastern China during May–September 2017–2022

|              | Meteorological variable |                 |                 |      |              | Meteorological variable |                 |                 |      |
|--------------|-------------------------|-----------------|-----------------|------|--------------|-------------------------|-----------------|-----------------|------|
|              | 1 <sup>st</sup>         | 2 <sup>st</sup> | 3 <sup>st</sup> | R    |              | 1 <sup>st</sup>         | 2 <sup>st</sup> | 3 <sup>st</sup> | R    |
| Taian        | T                       | TP              | TCC             | 0.71 | Beijing      | MSLP                    | BLH             | V               | 0.30 |
| Puyang       | T                       | V850            | TP              | 0.79 | Tianjing     | V                       | MSLP            | BLH             | 0.27 |
| Rizhao       | T                       | U               | TCC             | 0.67 | Baoding      | MSLP                    | V               | BLH             | 0.28 |
| Jining       | T                       | TP              | V850            | 0.77 | Lanfang      | MSLP                    | BLH             | V               | 0.32 |
| Xinxiang     | T                       | TCC             | BLH             | 0.74 | Shijiazhuang | MSLP                    | BLH             | V               | 0.24 |
| Jiaozuo      | T                       | TP              | TCC             | 0.81 | Handan       | T                       | MSLP            | U               | 0.31 |
| Heze         | T                       | V850            | TP              | 0.78 | Qinghuangdao | TCC                     | U               | MSLP            | 0.36 |
| Linyi        | T                       | TP              | TCC             | 0.73 | Cangzhou     | V                       | BLH             | MSLP            | 0.35 |
| Kaifeng      | T                       | V850            | TP              | 0.78 | Xingtai      | MSLP                    | BLH             | V               | 0.25 |
| Zhengzhou    | T                       | V850            | TP              | 0.78 | Hengshui     | V                       | MSLP            | BLH             | 0.38 |
| Luoyang      | U                       | TCC             | V               | 0.28 | Tangshan     | TCC                     | MSLP            | T               | 0.27 |
| Zaozhuang    | T                       | TP              | TCC             | 0.81 | Jinan        | T                       | TP              | V850            | 0.77 |
| Lianyungang  | TCC                     | U               | TP              | 0.68 | Qingdao      | U                       | BLH             | RH              | 0.45 |
| Shangqiu     | T                       | TP              | V850            | 0.71 | Zibo         | T                       | TP              | V850            | 0.70 |
| Xuzhou       | T                       | TCC             | TP              | 0.74 | Dongying     | T                       | RH              | V               | 0.66 |
| Xuchang      | T                       | V850            | TCC             | 0.70 | Yantai       | U                       | T               | RH              | 0.44 |
| Suqian       | RH                      | TCC             | TP              | 0.74 | Weifang      | T                       | TP              | U               | 0.68 |
| Huaipei      | TCC                     | T               | TP              | 0.74 | Weihai       | U                       | T               | RH              | 0.44 |
| Pingdingshan | T                       | V850            | U               | 0.66 | Dezhou       | T                       | TP              | V850            | 0.75 |
| Bozhou       | TCC                     | T               | TP              | 0.67 | Liaocheng    | T                       | V850            | TP              | 0.77 |
| Zhoukou      | T                       | TCC             | RH              | 0.73 | Binzhou      | T                       | TP              | V               | 0.66 |
| Luohe        | T                       | V850            | RH              | 0.75 | Shaoxing     | T                       | V               | TP              | 0.66 |
| Suzhou       | TCC                     | T               | TP              | 0.71 | Jinhua       | T                       | V               | TP              | 0.59 |
| Huaiian      | T                       | TCC             | TP              | 0.72 | Taizhou      | U                       | V               | T               | 0.62 |
| Yancheng     | TP                      | V850            | U               | 0.56 | Ningbo       | T                       | V               | U               | 0.69 |
| Nanyang      | T                       | TCC             | RH              | 0.74 | Wuhan        | TCC                     | RH              | V850            | 0.75 |
| Zhumadian    | TCC                     | BLH             | TP              | 0.67 | Changsha     | RH                      | TCC             | V               | 0.76 |
| Fuyang       | RH                      | TCC             | MSLP            | 0.74 | Jingzhou     | RH                      | V850            | T               | 0.84 |
| Bengbu       | T                       | TCC             | TP              | 0.72 | Yueyang      | RH                      | TCC             | U               | 0.82 |
| Huainan      | TCC                     | RH              | MSLP            | 0.68 | Zhuzhou      | RH                      | V               | T               | 0.73 |
| Xinyang      | RH                      | TCC             | U               | 0.74 | Xiangtan     | RH                      | V               | TCC             | 0.78 |
| Suizhou      | RH                      | TCC             | MSLP            | 0.75 | Yichang      | RH                      | TCC             | V850            | 0.79 |
| Shanghai     | T                       | U               | RH              | 0.72 | Yiyang       | RH                      | TCC             | V850            | 0.80 |
| Nanjing      | TCC                     | V850            | V               | 0.61 | Changde      | TCC                     | V850            | T               | 0.74 |
| Wuxi         | TP                      | TCC             | U               | 0.66 | Jingmen      | RH                      | V850            | T               | 0.76 |

|           |     |      |      |      |            |      |      |     |      |
|-----------|-----|------|------|------|------------|------|------|-----|------|
| Changzhou | TCC | TP   | BLH  | 0.60 | Huangshi   | RH   | TCC  | V   | 0.76 |
| Suzhou    | T   | TP   | U    | 0.63 | Huanggang  | TCC  | RH   | U   | 0.72 |
| Nantong   | T   | RH   | BLH  | 0.75 | Xianning   | RH   | V850 | T   | 0.80 |
| Yangzhou  | TCC | TP   | V850 | 0.61 | Xiaogan    | RH   | TCC  | U   | 0.72 |
| Zhenjiang | TCC | TP   | MSLP | 0.61 | Quzhou     | RH   | V850 | T   | 0.74 |
| Taizhou   | TCC | V850 | U    | 0.61 | Lishui     | RH   | U    | V   | 0.65 |
| Luan      | TCC | MSLP | T    | 0.61 | Wenzhou    | U    | RH   | V   | 0.65 |
| Hangzhou  | TP  | TCC  | T    | 0.69 | Jiujiang   | TCC  | V850 | RH  | 0.80 |
| Jiaxing   | T   | TP   | U    | 0.70 | Nanchang   | RH   | V850 | T   | 0.72 |
| Huzhou    | TP  | TCC  | T    | 0.67 | Jingdezhen | RH   | V850 | TCC | 0.75 |
| Hefei     | TCC | TP   | V    | 0.59 | Shangrao   | TCC  | V850 | T   | 0.76 |
| Wuhu      | TCC | TP   | V    | 0.65 | Yingtian   | TCC  | V850 | T   | 0.78 |
| Maanshan  | TCC | TP   | MSLP | 0.66 | Yichun     | V850 | TCC  | T   | 0.75 |
| Tonglin   | TCC | MSLP | V    | 0.63 | Fuzhou     | V850 | T    | TCC | 0.82 |
| Anqing    | TCC | V    | TP   | 0.58 | Jian       | TCC  | T    | V   | 0.66 |
| Chuzhou   | TCC | TP   | MSLP | 0.58 | Xinyu      | V850 | TCC  | V   | 0.75 |
| Chizhou   | TCC | V    | MSLP | 0.63 | Pingxiang  | V850 | TCC  | V   | 0.75 |
| Xuancheng | TCC | V    | MSLP | 0.58 | -          | -    | -    | -   | -    |

11. Page 7, Line 7: so, the perturbations of background ozone are neglected when considering the observed O<sub>3</sub> anomalies. It's not true as transport can contribute to this term.

We thank the reviewer for pointing out this issue. We are also aware of this issue, so we have corrected the MLR model in the manuscript. The updated MLR model first de-seasonalizes the O<sub>3</sub> concentration time series to remove meteorological variability in O<sub>3</sub> concentration. Following Liu et al. (2023) and Li et al. (2020), the MLR model fitted the deseasonalized and detrended 10 d mean 98<sup>th</sup> or 2<sup>nd</sup> O<sub>3</sub> percentile time series to the deseasonalized and detrended 10 d mean meteorological variables. The deseasonalized and detrended time series data were constructed by removing the 50 d moving average data from the 10 d moving average data. The stepwise MLR model has the following form:

$$Y(t) = R + \sum_{k=1}^n \beta_k X_k(t) \quad (1)$$

Where  $Y(t)$  is the deseasonalized and detrended daily surface 98<sup>th</sup> or 2<sup>nd</sup> O<sub>3</sub> percentile time series,  $R$  is the regression constant,  $\beta_k$  is the regression coefficient, and  $X_k$  is the deseasonalized and detrended daily meteorological variable considered as a possible O<sub>3</sub> covariate. Stepwise regressions were performed, adding and removing terms based on their independent statistical significance to obtain the best model fit.

Daily meteorological variables were obtained from the ERA5 reanalysis data (Download from <https://cds.climate.copernicus.eu>, last access: January 7, 2024), included temperature (T, °C), surface relative humidity (RH, %), total cloud cover (TCC), total precipitation (TP, mm), mean sea level pressure (MSLP, hPa), wind speed of U, V components (U, V, m/s), boundary layer height (BLH, m), and vertical velocity at 850 hPa (V850, m/s).

First, we used the MLR model to remove the effects of meteorological variability from the 2017 to 2022 98<sup>th</sup> or 2<sup>nd</sup> O<sub>3</sub> percentile trends. We apply Eq. (1) to the meteorological anomalies  $X_k$  during May–September 2017–2022, obtained by removing the 6–year means of the 50 d moving averages from the 10 d mean time series. The anomalies calculated in this process were deseasonalized but not detrended. This yields the meteorology–driven 98<sup>th</sup> or 2<sup>nd</sup> O<sub>3</sub> percentile anomalies  $Y_m(t)$

$$Y_m(t) = R + \sum_{k=1}^n \beta_k X_k(t) \quad (2)$$

Secondly, to avoid overfitting, only the three most important meteorological parameters were selected based on their individual contributions to the regressed 98<sup>th</sup> or 2<sup>nd</sup> O<sub>3</sub> percentiles, along with the requirement that they be statistically significant above the 95% confidence level in the MLR model (Li et al., 2018). The fit results and selected meteorological variables varied by city but were regionally consistent (Table R1 and Table R2). The 98<sup>th</sup> or 2<sup>nd</sup> O<sub>3</sub> percentile anomalies  $Y_a(t)$  obtained by deseasonalizing, but not detrending, the 98<sup>th</sup> or 2<sup>nd</sup> O<sub>3</sub> percentile time series in a similar manner as for the meteorological variables (by removing the 6–year means of the 50 d moving averages). The residual anomaly  $Y_r(t)$  after removing the meteorology–driven 98<sup>th</sup> or 2<sup>nd</sup> O<sub>3</sub> percentile anomalies from the MLR model is given by

$$Y_r(t) = Y_a(t) - Y_m(t) \quad (3)$$

Finally, the residual is an anomalous component that cannot be explained by the MLR meteorological model and is referred to as meteorologically corrected data by (Zhai et al., 2019). It consists of noise due to the limitations of the MLR model and other factors and can be mainly attributed to long–term trends in anthropogenic emission changes over a 6–year period. The trend in the regressed 98<sup>th</sup> or 2<sup>nd</sup> O<sub>3</sub> percentile reflected the meteorological contribution, and the residual was then used to reflect the presumed anthropogenic contribution. For the updated MLR model, please refer to section 2.4 in the manuscript.

12. Page 8, Line 2: HRB is surrounded by very polluted area, and it can be affected by pollution transport. It's hard to define "background" here, and the background concentrations can change interannually.

We agree with this suggestion, and this is one of the errors in the separation of primary and secondary sources of HCHO by Regression Model. We have extensively reviewed previous studies, and most of the literature has set the background concentration of HCHO at 1 ppb (Sun et al., 2021; Hong et al., 2018; Lin et al., 2022). In addition, according to the ground–level

measurements of HCHO at a rural site in the eastern China by Ma et al. (2016) and Wang et al. (2015), the background level of HCHO near the surface was approximately 1.0 ppb. Therefore, we used this background concentration (1 ppb) in our regression model. Moreover, The fitting results of the regression model are also comparable to those in the previous literature (Hong et al., 2018), so we consider the separation of the primary and secondary sources of HCHO in the manuscript to be reliable.

13. Page 10, line 5: how about the variations in the background?

We have corrected the MLR model in the manuscript (refer to 11). The natural background O<sub>3</sub> concentration is deducted before the stepwise multiple regression. Following Liu et al., (2023) and Li et al. (2020), the natural background O<sub>3</sub> concentration obtained by the 6–year means of the 50 d moving averages from the 10 d mean time series. The new manuscript focuses on the drivers of trends in peak (98<sup>th</sup>) and low (2<sup>nd</sup>) O<sub>3</sub> concentrations.

14. Page 10, line 28: do you include nighttime O<sub>3</sub> data in the MLR model? Why?

It is included nighttime O<sub>3</sub> data in the MLR model. This study attempts to reveal the surface low, typical, and peak O<sub>3</sub> trends in eastern Chinese cities in recent years, and to explore the driving forces behind these trends. The 2<sup>nd</sup> and 98<sup>th</sup> percentiles of hourly O<sub>3</sub> concentrations in each month for cities in eastern China were calculated to determine their long–term trends at low and peak concentration levels, respectively (Li et al., 2022; Cooper et al., 2012; Gaudel et al., 2020). In principle, the lowest daily O<sub>3</sub> concentrations usually occur before sunrise due to nighttime titration of NO, and the low percentile (2<sup>nd</sup>) usually characterizes baseline or background conditions because increases in the low O<sub>3</sub> percentile tend to be associated with increases in baseline or background O<sub>3</sub> concentrations.

15. Page 11, Line 2: “(0.108 ppb/year, +114%)”, what’s this for?

It is the contribution of anthropogenic components on 2<sup>nd</sup> O<sub>3</sub> percentiles trends. We updated the MLR model in the manuscript, rearranged section 3.2, and removed this description.

16. Page 11, line 27-28: This is weird. When S<sub>no2</sub> is much larger than S<sub>hcho</sub> (low FNR), it should be VOC-limited, instead of NO<sub>x</sub>-limited.

As shown in Fig.R1, the red and blue line represents the S<sub>NO2</sub> and S<sub>HCHO</sub>, respectively. When S<sub>NO2</sub> is much larger than S<sub>HCHO</sub>, the FNR is higher, and the O<sub>3</sub> formation is more sensitive to NO<sub>x</sub>, which is NO<sub>x</sub>–limited regime.

17. Figure 6: How do you calculate the slope of the ratio of  $O_3$  to  $S_{no2}$ , and the slope of the ratio of  $O_3$  to  $S_{hcho}$ ? Are you using the ground measurements for all years? Does each point represent the fitted slope each day? I'm curious the temporal intervals between datapoints shown here. First, the surface-hourly averaged secondary HCHO and  $NO_2$  VMRs during May–September based on MAX–DOAS observations were normalized by dividing their respective mean values because of the large differences in surface HCHO and  $NO_2$  concentrations. The ratio of the hourly averaged  $O_3$  VMRs to the hourly averaged normalized  $NO_2$  VMRs ( $S_{NO2}$ ) and the ratio of the hourly averaged  $O_3$  VMRs to the hourly averaged normalized secondary HCHO VMRs ( $S_{HCHO}$ ) were calculated. Finally, third-order polynomials were used to fit  $S_{NO2}$  and  $S_{HCHO}$  (Fig.R1).  $S_{HCHO}$  and  $S_{NO2}$  were calculated using data from the warm season (May–September) for all years of MAX–DOAS observations, and each point in Fig.R1 in the manuscript represents the slope for each hour, and the temporal intervals is one hour between datapoints shown in Fig.R1 in the manuscript. We have added this statement to the manuscript, please refer to Page 11 Line 22–27 in the manuscript.

18. Figure 6: I'm curious will the FNR threshold change year by year based on this methodology? How will the interannual variation of the threshold affect your analyses? Please elaborate more.

Differences in the thresholds of the FNR at different times or regions are due to differences in the sources of the corresponding indicator species, whose thresholds vary with environmental conditions (Liu et al., 2021). We calculated the FNR thresholds separately according to different years, and it can be found that the differences in FNR thresholds in different years are very small (FigR5–R7), and the differences in FNR thresholds are mainly between different cities. Therefore, the interannual variation in the threshold have little effect on the results in our manuscript.

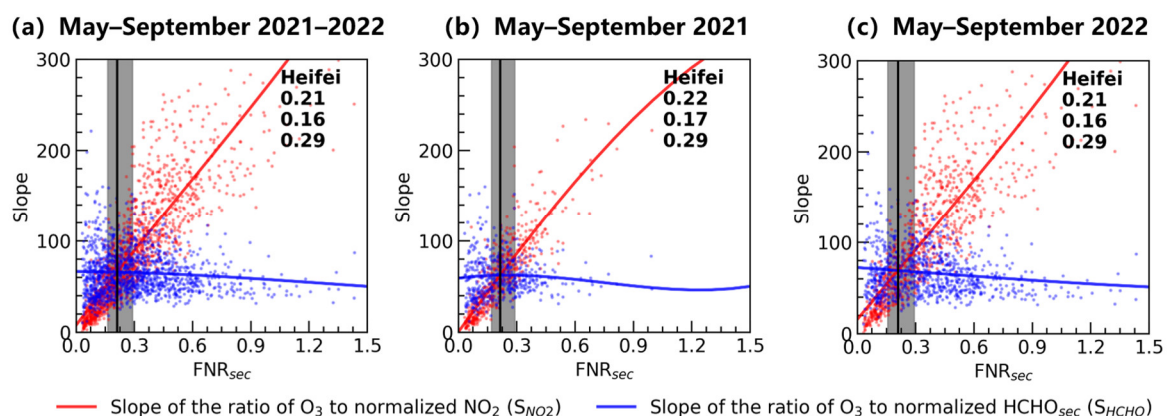

**Fig.R5.** Three-order fitting of slopes of O<sub>3</sub> VMRs versus normalized NO<sub>2</sub> VMRs and slopes of O<sub>3</sub> VMRs versus normalized secondary HCHO VMRs in different FNR<sub>sec</sub> values in Hefei, during (a) May–September 2021–2022, (b) May–September 2021, and (c) May–September 2022.

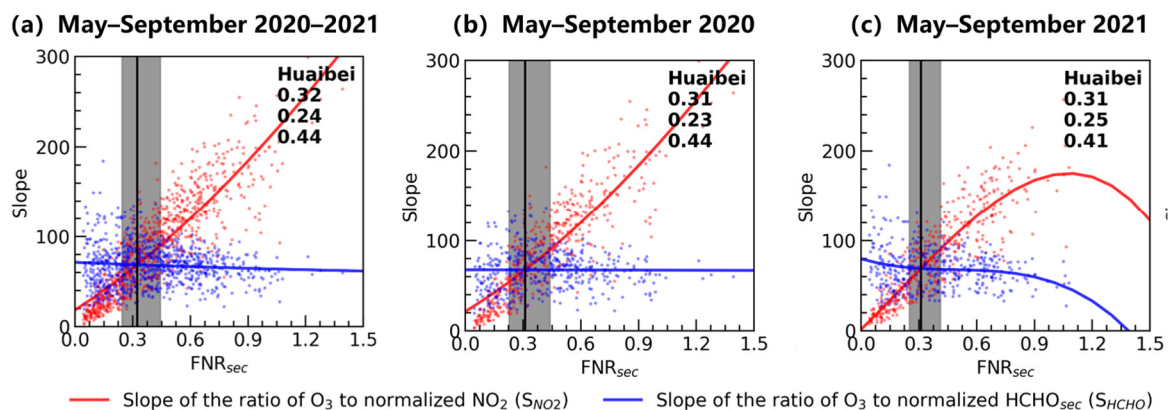

**Fig.R6.** Three-order fitting of slopes of O<sub>3</sub> VMRs versus normalized NO<sub>2</sub> VMRs and slopes of O<sub>3</sub> VMRs versus normalized secondary HCHO VMRs in different FNR<sub>sec</sub> values in Huaibei, during (a) May–September 2020–2021, (b) May–September 2020, and (c) May–September 2021.

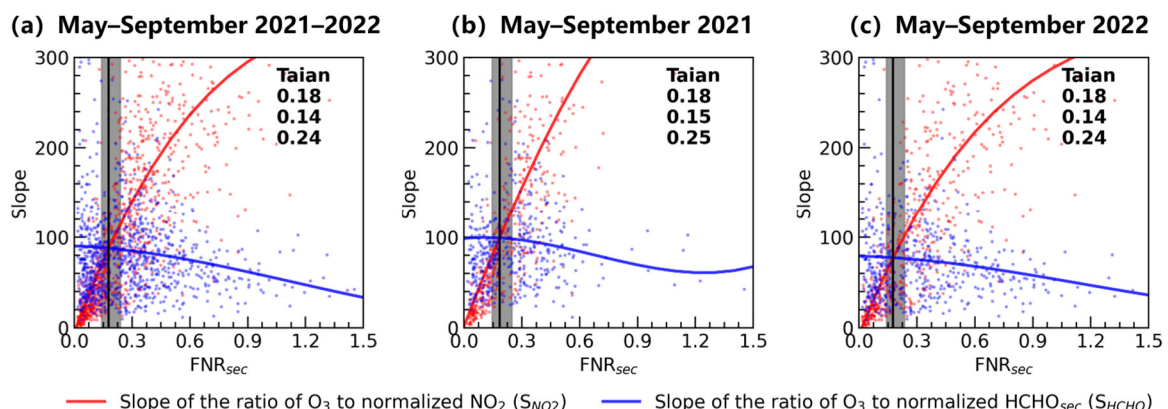

**Fig.R7.** The same as Fig.R5 but in Tai'an.

**Reference:**

Chang, C.-Y., Faust, E., Hou, X., Lee, P., Kim, H. C., Hedquist, B. C., and Liao, K.-J.: Investigating ambient ozone formation regimes in neighboring cities of shale plays in the Northeast United States using photochemical modeling and satellite retrievals, *Atmos. Environ.*, 142, 152-170, 10.1016/j.atmosenv.2016.06.058, 2016.

Chu, W., Li, H., Ji, Y., Zhang, X., Xue, L., Gao, J., and An, C.: Research on ozone formation sensitivity based on observational methods: Development history, methodology, and application and prospects in China, *J. Environ. Sci-China*, 138, 543-560, 10.1016/j.jes.2023.02.052, 2024.

Cooper, O. R., Gao, R. S., Tarasick, D., Leblanc, T., and Sweeney, C.: Long - term ozone trends at rural ozone monitoring sites across the United States, 1990 - 2010, *J. Geophys. Res-atmos.*, 117, 10.1029/2012jd018261, 2012.

Cynthia Lin, C. Y., Jacob, D. J., Munger, J. W., and Fiore, A. M.: Increasing background ozone in surface air over the United States, *Geophys. Res. Lett.*, 27, 3465-3468, 2000.

De Smedt, I., Pinardi, G., Vigouroux, C., Compernelle, S., Bais, A., Benavent, N., Boersma, F., Chan, K.-L., Donner, S., Eichmann, K.-U., Hedelt, P., Hendrick, F., Irie, H., Kumar, V., Lambert, J.-C., Langerock, B., Lerot, C., Liu, C., Loyola, D., Peters, A., Richter, A., Rivera Cárdenas, C., Romahn, F., Ryan, R. G., Sinha, V., Theys, N., Vlietinck, J., Wagner, T., Wang, T., Yu, H., and Van Roozendaal, M.: Comparative assessment of TROPOMI and OMI formaldehyde observations and validation against MAX-DOAS network column measurements, *Atmos. Chem. Phys.*, 21, 12561-12593, 10.5194/acp-21-12561-2021, 2021.

Gaudel, A., Cooper, O. R., Chang, K.-L., Bourgeois, I., Ziemke, J. R., Strode, S. A., Oman, L. D., Sellitto, P., Nédélec, P., and Blot, R.: Aircraft observations since the 1990s reveal increases of tropospheric ozone at multiple locations across the Northern Hemisphere, *Sci. Adv.*, 6, eaba8272, 2020.

Hong, Q., Liu, C., Chan, K. L., Hu, Q., Xie, Z., Liu, H., Si, F., and Liu, J.: Ship-based MAX-DOAS measurements of tropospheric NO<sub>2</sub>, SO<sub>2</sub>, and HCHO distribution along the Yangtze River, *Atmos. Chem. Phys.*, 18, 5931-5951, 10.5194/acp-18-5931-2018, 2018.

Jacob, D. J., Logan, J. A., and Murti, P. P.: Effect of rising Asian emissions on surface ozone in the United States, *Geophys. Res. Lett.*, 26, 2175-2178, 1999.

Jin, X., Fiore, A. M., Murray, L. T., Valin, L. C., Lamsal, L. N., Duncan, B., Folkert Boersma, K., De Smedt, I., Abad, G. G., Chance, K., and Tonnesen, G. S.: Evaluating a Space-Based Indicator of Surface Ozone-NO<sub>x</sub>-VOC Sensitivity Over Midlatitude Source Regions and Application to Decadal Trends, *J. Geophys. Res.-atmos.*, 122, 10.1002/2017jd026720, 2017.

Li, J., Lu, K., Lv, W., Li, J., Zhong, L., Ou, Y., Chen, D., Huang, X., and Zhang, Y.: Fast increasing of surface ozone concentrations in Pearl River Delta characterized by a regional air quality monitoring network during 2006–2011, *J. Environ. Sci-China*, 26, 23-36, 10.1016/s1001-0742(13)60377-0, 2014.

Li, K., Jacob, D. J., Liao, H., Shen, L., Zhang, Q., and Bates, K. H.: Anthropogenic drivers of 2013–2017 trends in summer surface ozone in China, *Proc. Natl. Acad. Sci.*, 116, 422-427, 10.1073/pnas.1812168116, 2018.

Li, K., Jacob, D. J., Shen, L., Lu, X., De Smedt, I., and Liao, H.: Increases in surface ozone pollution in China from 2013 to 2019: anthropogenic and meteorological influences, *Atmos. Chem. Phys.*, 20, 11423-11433, 10.5194/acp-20-11423-2020, 2020.

Li, X.-B., Yuan, B., Parrish, D. D., Chen, D., Song, Y., Yang, S., Liu, Z., and Shao, M.: Long-term trend of ozone in southern China reveals future mitigation strategy for air pollution, *Atmos. Environ.*, 269, 10.1016/j.atmosenv.2021.118869, 2022.

Lin, H., Xing, C., Hong, Q., Liu, C., Ji, X., Liu, T., Lin, J., Lu, C., Tan, W., Li, Q., and Liu, H.: Diagnosis of Ozone Formation Sensitivities in Different Height Layers via MAX - DOAS Observations in Guangzhou, *J. Geophys. Res.-atmos.*, 127, 10.1029/2022jd036803, 2022.

Liu, J., Li, X., Tan, Z., Wang, W., Yang, Y., Zhu, Y., Yang, S., Song, M., Chen, S., Wang, H., Lu, K., Zeng, L., and Zhang, Y.: Assessing the Ratios of Formaldehyde and Glyoxal to NO<sub>2</sub> as Indicators of O<sub>3</sub>-NO<sub>x</sub>-VOC Sensitivity, *Environ. Sci. Technol.*, 55, 10935-10945, 10.1021/acs.est.0c07506, 2021.

Liu, Y., Geng, G., Cheng, J., Liu, Y., Xiao, Q., Liu, L., Shi, Q., Tong, D., He, K., and Zhang, Q.: Drivers of Increasing Ozone during the Two Phases of Clean Air Actions in China 2013–2020, *Environ. Sci. Technol.*, 57, 8954-8964, 10.1021/acs.est.3c00054, 2023.

Ma, Y., Diao, Y., Zhang, B., Wang, W., Ren, X., Yang, D., Wang, M., Shi, X., and Zheng, J.: Detection of formaldehyde emissions from an industrial zone in the Yangtze River Delta region of China using a proton transfer reaction ion-drift chemical ionization mass spectrometer, *Atmos. Meas. Tech.*, 9, 6101-6116, 10.5194/amt-9-6101-2016, 2016.

Martin, R. V., Fiore, A. M., and Van Donkelaar, A.: Space - based diagnosis of surface ozone sensitivity to anthropogenic emissions, *Geophys. Res. Lett.*, 31, 10.1029/2004gl019416, 2004.

Ren, J., Guo, F., and Xie, S.: Diagnosing ozone-NO<sub>x</sub>-VOC sensitivity and revealing causes of ozone increases in China based on 2013–2021 satellite retrievals, *Atmos. Chem. Phys.*, 22, 15035-15047, 10.5194/acp-22-15035-2022, 2022.

Sun, Y., Yin, H., Liu, C., Zhang, L., Cheng, Y., Palm, M., Notholt, J., Lu, X., Vigouroux, C., Zheng, B., Wang, W., Jones, N., Shan, C., Qin, M., Tian, Y., Hu, Q., Meng, F., and Liu, J.: Mapping the drivers of formaldehyde

(HCHO) variability from 2015 to 2019 over eastern China: insights from Fourier transform infrared observation and GEOS-Chem model simulation, *Atmos. Chem. Phys.*, 21, 6365-6387, 10.5194/acp-21-6365-2021, 2021.

Vigouroux, C., Langerock, B., Bauer Aquino, C. A., Blumenstock, T., Cheng, Z., De Mazière, M., De Smedt, I., Grutter, M., Hannigan, J. W., Jones, N., Kivi, R., Loyola, D., Lutsch, E., Mahieu, E., Makarova, M., Metzger, J. M., Morino, I., Murata, I., Nagahama, T., Notholt, J., Ortega, I., Palm, M., Pinardi, G., Röhling, A., Smale, D., Stremme, W., Strong, K., Sussmann, R., Té, Y., van Roozendaal, M., Wang, P., and Winkler, H.: TROPOMI–Sentinel-5 Precursor formaldehyde validation using an extensive network of ground-based Fourier-transform infrared stations, *Atmos. Meas. Tech.*, 13, 3751-3767, 10.5194/amt-13-3751-2020, 2020.

Wang, M., Chen, W., Shao, M., Lu, S., Zeng, L., and Hu, M.: Investigation of carbonyl compound sources at a rural site in the Yangtze River Delta region of China, *J. Environ. Sci-China*, 28, 128-136, 10.1016/j.jes.2014.12.001, 2015.

Wang, Y., Dörner, S., Donner, S., Böhnke, S., De Smedt, I., Dickerson, R. R., Dong, Z., He, H., Li, Z., Li, Z., Li, D., Liu, D., Ren, X., Theys, N., Wang, Y., Wang, Y., Wang, Z., Xu, H., Xu, J., and Wagner, T.: Vertical profiles of NO<sub>2</sub>, SO<sub>2</sub>, HONO, HCHO, CHOCHO and aerosols derived from MAX-DOAS measurements at a rural site in the central western North China Plain and their relation to emission sources and effects of regional transport, *Atmos. Chem. Phys.*, 19, 5417-5449, 10.5194/acp-19-5417-2019, 2019.

Wang, Z., Liu, C., Xie, Z., Hu, Q., Andreae, M. O., Dong, Y., Zhao, C., Liu, T., Zhu, Y., Liu, H., Xing, C., Tan, W., Ji, X., Lin, J., and Liu, J.: Elevated dust layers inhibit dissipation of heavy anthropogenic surface air pollution, *Atmos. Chem. Phys.*, 20, 14917-14932, 10.5194/acp-20-14917-2020, 2020.

Xing, C., Liu, C., Wang, S., Chan, K. L., Gao, Y., Huang, X., Su, W., Zhang, C., Dong, Y., Fan, G., Zhang, T., Chen, Z., Hu, Q., Su, H., Xie, Z., and Liu, J.: Observations of the vertical distributions of summertime atmospheric pollutants and the corresponding ozone production in Shanghai, China, *Atmos. Chem. Phys.*, 17, 14275-14289, 10.5194/acp-17-14275-2017, 2017.

Zhai, S., Jacob, D. J., Wang, X., Shen, L., Li, K., Zhang, Y., Gui, K., Zhao, T., and Liao, H.: Fine particulate matter (PM<sub>2.5</sub>) trends in China, 2013–2018: separating contributions from anthropogenic emissions and meteorology, *Atmos. Chem. Phys.*, 19, 11031-11041, 10.5194/acp-19-11031-2019, 2019.

Zhang, Q., Zheng, Y., Tong, D., Shao, M., Wang, S., Zhang, Y., Xu, X., Wang, J., He, H., Liu, W., Ding, Y., Lei, Y., Li, J., Wang, Z., Zhang, X., Wang, Y., Cheng, J., Liu, Y., Shi, Q., Yan, L., Geng, G., Hong, C., Li, M., Liu, F., Zheng, B., Cao, J., Ding, A., Gao, J., Fu, Q., Huo, J., Liu, B., Liu, Z., Yang, F., He, K., and Hao, J.: Drivers of improved PM<sub>2.5</sub> air quality in China from 2013 to 2017, *Proc. Natl. Acad. Sci.*, 116, 24463-24469, 10.1073/pnas.1907956116, 2019.

Zheng, B., Tong, D., Li, M., Liu, F., Hong, C., Geng, G., Li, H., Li, X., Peng, L., Qi, J., Yan, L., Zhang, Y., Zhao, H., Zheng, Y., He, K., and Zhang, Q.: Trends in China's anthropogenic emissions since 2010 as the consequence of clean air actions, *Atmos. Chem. Phys.*, 18, 14095-14111, 10.5194/acp-18-14095-2018, 2018.
